# Supplementary material for: The N,N,N-trimethylammonium moiety as tetrel bond donor site: crystallographic and computational studies
Source: Royal Society of Chemistry journal article supplement (doi:10.1039/d2cp02535c), 2022-01-01
Supplement: d2cp02535c2.pdf [file d2cp02535c2.pdf]

## Electronic Supplementary Information

# The *N,N,N*-trimethylammonium moiety as tetrel bond donor site: crystallographic and computational studies

Andrea Daolio,<sup>a</sup> Erna K. Wieduwilt,<sup>b</sup> Andrea Pizzi,<sup>a\*</sup> Alessandro Genoni,<sup>b\*</sup> Giuseppe Resnati,<sup>a</sup> Giancarlo Terraneo<sup>a\*</sup>

a. Department of Chemistry, Materials and Chemical Engineering “Giulio Natta”, Politecnico di Milano, Via L. Mancinelli 7, I-20131 Milan, Italy. E-mail: andrea.pizzi@polimi.it and giancarlo.terraneo@polimi.it

b. Université de Lorraine & CNRS, Laboratoire de Physique et Chimie Théoriques (LPCT), UMR CNRS 7019, 1 Boulevard Arago, F-57078 Metz, France. E-mail: alessandro.genoni@univ-lorraine.fr

## Table of Content:

|                                                            |           |
|------------------------------------------------------------|-----------|
| <b>S.1. Materials and Methods.....</b>                     | <b>3</b>  |
| <b>S.2. Crystallographic Details.....</b>                  | <b>4</b>  |
| <b>S.3. CSD Surveys.....</b>                               | <b>37</b> |
| <b>S.4. Fundamentals of Hirshfeld Atom Refinement.....</b> | <b>38</b> |
| <b>S.5. References.....</b>                                | <b>40</b> |

## **S.1. Materials and Methods.**

### **S.1.1. Materials.**

Compounds and solvents were purchased from Sigma Aldrich and TCI and used without further purification.

### **S.1.2. Methods.**

The single crystal data of all the structures displayed in this work were collected at Bruker SMART APEX II CCD area detector diffractometer at 100 K. Data collection, unit cell refinement and data reduction were performed using Bruker SAINT. The structure was solved by direct methods using SHELXT and refined by full-matrix least-squares on  $F^2$  with anisotropic displacement parameters for the non-H atoms using SHELXL-2016/6. Absorption correction was performed based on multi-scan procedure using SADABS. Structure analysis was aided by use of the programs PLATON. The hydrogen atoms were calculated in ideal positions with isotropic displacement parameters set to  $1.2 \times U_{eq}$  of the attached atom.

## S.2. Crystallographic Details.

### S.2.1. Parameters and data for X-Ray crystal structures 1-5 refined by IAM.

**Table S.1.** Crystal data and structure refinement for **1<sup>1</sup>**.

|                                      |                                                                |
|--------------------------------------|----------------------------------------------------------------|
| Identification code                  | 1                                                              |
| Empirical formula                    | C <sub>12</sub> H <sub>30</sub> Br <sub>2</sub> N <sub>2</sub> |
| Formula weight                       | 362.20                                                         |
| Temperature/K                        | 93(2)                                                          |
| Crystal system                       | monoclinic                                                     |
| Space group                          | P2 <sub>1</sub> /c                                             |
| a/Å                                  | 5.4796(4)                                                      |
| b/Å                                  | 13.1109(11)                                                    |
| c/Å                                  | 11.5815(9)                                                     |
| α/°                                  | 90.00                                                          |
| β/°                                  | 93.580(4)                                                      |
| γ/°                                  | 90.00                                                          |
| Volume/Å <sup>3</sup>                | 830.42(11)                                                     |
| Z                                    | 2                                                              |
| ρ <sub>calc</sub> /g/cm <sup>3</sup> | 1.449                                                          |
| μ/mm <sup>-1</sup>                   | 4.864                                                          |
| F(000)                               | 372.0                                                          |
| Crystal size/mm <sup>3</sup>         | 0.12 × 0.1 × 0.06                                              |
| Radiation                            | MoKα (λ = 0.71073)                                             |
| 2θ range for data collection/°       | 6.22 to 65.58                                                  |
| Index ranges                         | -5 ≤ h ≤ 8, -18 ≤ k ≤ 19, -17 ≤ l ≤ 13                         |
| Reflections collected                | 13885                                                          |
| Independent reflections              | 2897 [R <sub>int</sub> = 0.0397, R <sub>sigma</sub> = 0.0365]  |
| Data/restraints/parameters           | 2897/0/118                                                     |
| Goodness-of-fit on F <sup>2</sup>    | 1.005                                                          |
| Final R indexes [I > 2σ (I)]         | R <sub>1</sub> = 0.0235, wR <sub>2</sub> = 0.0441              |
| Final R indexes [all data]           | R <sub>1</sub> = 0.0408, wR <sub>2</sub> = 0.0481              |
| CCDC Number                          | 952024                                                         |

**Table S.2.** Fractional Atomic Coordinates ( $\times 10^4$ ) and Equivalent Isotropic Displacement Parameters ( $\text{\AA}^2 \times 10^3$ ) for **1**.  $U_{\text{eq}}$  is defined as 1/3 of the trace of the orthogonalised  $U_{ij}$  tensor.

| Atom | x         | y           | z           | U(eq)    |
|------|-----------|-------------|-------------|----------|
| Br1  | 3771.2(3) | 1031.33(11) | 1853.34(12) | 14.66(5) |
| N1   | 9751(2)   | 3226.0(9)   | 3806.0(10)  | 11.1(2)  |
| C1   | 11017(3)  | 2269.5(11)  | 4266.7(13)  | 13.1(3)  |
| C2   | 9325(3)   | 1368.5(11)  | 4424.0(14)  | 15.6(3)  |
| C4   | 8058(3)   | 3626.1(12)  | 4661.8(13)  | 14.2(3)  |
| C5   | 11672(3)  | 4016.0(12)  | 3624.1(14)  | 15.0(3)  |
| C6   | 8386(3)   | 3034.8(13)  | 2669.0(13)  | 16.9(3)  |
| C3   | 10798(3)  | 466.7(11)   | 4918.9(14)  | 16.7(3)  |

**Table S.3.** Anisotropic Displacement Parameters ( $\text{\AA}^2 \times 10^3$ ) for **1**. The Anisotropic displacement factor exponent takes the form:  $-2\pi^2[h^2a^*2U_{11}+2hka^*b^*U_{12}+\dots]$ .

| Atom | $U_{11}$ | $U_{22}$ | $U_{33}$ | $U_{23}$ | $U_{13}$ | $U_{12}$ |
|------|----------|----------|----------|----------|----------|----------|
| Br1  | 14.82(7) | 15.39(7) | 13.75(7) | -3.67(6) | 0.73(5)  | -1.89(6) |
| N1   | 11.2(5)  | 10.5(5)  | 11.7(5)  | 0.0(4)   | 0.7(4)   | 0.6(4)   |
| C1   | 15.6(7)  | 9.4(6)   | 14.0(7)  | 0.7(5)   | -0.1(5)  | 2.2(5)   |
| C2   | 19.7(7)  | 10.4(6)  | 16.2(7)  | 0.3(5)   | -1.5(6)  | -0.7(5)  |
| C4   | 14.9(7)  | 12.5(6)  | 15.6(7)  | -0.2(5)  | 2.9(5)   | 3.6(5)   |
| C5   | 14.2(6)  | 12.8(6)  | 18.1(7)  | 1.6(6)   | 0.8(5)   | -3.3(6)  |
| C6   | 19.5(7)  | 15.9(7)  | 14.5(7)  | 0.4(6)   | -4.6(6)  | -2.2(6)  |
| C3   | 20.8(8)  | 11.0(7)  | 18.2(7)  | 1.0(5)   | 0.7(6)   | 1.8(5)   |

**Table S.4.** Bond Lengths for **1**.

| Atom | Atom | Length/\AA | Atom | Atom            | Length/\AA |
|------|------|------------|------|-----------------|------------|
| N1   | C1   | 1.5142(17) | C1   | C2              | 1.520(2)   |
| N1   | C4   | 1.4943(18) | C2   | C3              | 1.523(2)   |
| N1   | C5   | 1.5009(18) | C3   | C3 <sup>1</sup> | 1.523(3)   |
| N1   | C6   | 1.4943(18) |      |                 |            |

<sup>1</sup>2-X,-Y,1-Z

**Table S.5.** Bond Angles for **1**.

| Atom | Atom | Atom | Angle/°    | Atom            | Atom | Atom | Angle/°    |
|------|------|------|------------|-----------------|------|------|------------|
| C4   | N1   | C1   | 110.30(11) | C6              | N1   | C5   | 107.99(11) |
| C4   | N1   | C5   | 108.71(11) | N1              | C1   | C2   | 114.60(12) |
| C4   | N1   | C6   | 110.26(12) | C1              | C2   | C3   | 109.59(12) |
| C5   | N1   | C1   | 108.12(11) | C3 <sup>1</sup> | C3   | C2   | 112.03(16) |
| C6   | N1   | C1   | 111.38(11) |                 |      |      |            |

<sup>1</sup>2-X,-Y,1-Z**Table S.6.** Torsion Angles for **1**.

| A  | B  | C  | D               | Angle/°     | A  | B  | C  | D  | Angle/°     |
|----|----|----|-----------------|-------------|----|----|----|----|-------------|
| N1 | C1 | C2 | C3              | -178.52(12) | C5 | N1 | C1 | C2 | -176.21(12) |
| C1 | C2 | C3 | C3 <sup>1</sup> | -179.23(16) | C6 | N1 | C1 | C2 | -57.72(16)  |
| C4 | N1 | C1 | C2              | 65.05(15)   |    |    |    |    |             |

<sup>1</sup>2-X,-Y,1-Z**Table S.7.** Hydrogen Atom Coordinates ( $\text{\AA} \times 10^4$ ) and Isotropic Displacement Parameters ( $\text{\AA}^2 \times 10^3$ ) for **1**.

| Atom | x         | y        | z        | U(eq) |
|------|-----------|----------|----------|-------|
| H1A  | 11850(30) | 2501(13) | 4999(15) | 16    |
| H1B  | 12180(30) | 2077(13) | 3713(14) | 16    |
| H2A  | 8550(30)  | 1148(13) | 3693(17) | 19    |
| H2B  | 8010(30)  | 1543(14) | 4957(15) | 19    |
| H4A  | 6760(30)  | 3130(14) | 4805(15) | 21    |
| H4B  | 7350(30)  | 4211(14) | 4353(17) | 21    |
| H4C  | 8910(30)  | 3712(13) | 5387(17) | 21    |
| H5A  | 12550(30) | 4154(13) | 4341(17) | 23    |
| H5B  | 10890(30) | 4627(15) | 3350(15) | 23    |
| H5C  | 12720(30) | 3787(13) | 3077(16) | 23    |
| H6A  | 7120(40)  | 2587(14) | 2748(17) | 25    |
| H6B  | 9520(30)  | 2748(15) | 2165(16) | 25    |
| H6C  | 7810(30)  | 3650(14) | 2384(17) | 25    |
| H3A  | 11670(30) | 659(13)  | 5640(16) | 20    |
| H3B  | 12100(30) | 298(13)  | 4375(15) | 20    |

**Table S.8.** Crystal data and structure refinement for **2**<sup>2</sup>.

|                                      |                                                                               |
|--------------------------------------|-------------------------------------------------------------------------------|
| Identification code                  | <b>2</b>                                                                      |
| Empirical formula                    | C <sub>12</sub> H <sub>34</sub> N <sub>2</sub> O <sub>2</sub> Br <sub>2</sub> |
| Formula weight                       | 398.22                                                                        |
| Temperature/K                        | 103.15                                                                        |
| Crystal system                       | monoclinic                                                                    |
| Space group                          | P2 <sub>1</sub> /c                                                            |
| a/Å                                  | 7.3339(13)                                                                    |
| b/Å                                  | 18.292(3)                                                                     |
| c/Å                                  | 7.0915(12)                                                                    |
| α/°                                  | 90                                                                            |
| β/°                                  | 108.824(4)                                                                    |
| γ/°                                  | 90                                                                            |
| Volume/Å <sup>3</sup>                | 900.4(3)                                                                      |
| Z                                    | 2                                                                             |
| ρ <sub>calc</sub> /g/cm <sup>3</sup> | 1.4687                                                                        |
| μ/mm <sup>-1</sup>                   | 4.500                                                                         |
| F(000)                               | 411.1                                                                         |
| Crystal size/mm <sup>3</sup>         | 0.32 × 0.16 × 0.06                                                            |
| Radiation                            | Mo Kα (λ = 0.71073)                                                           |
| 2θ range for data collection/°       | 5.86 to 60.48                                                                 |
| Index ranges                         | -10 ≤ h ≤ 10, -25 ≤ k ≤ 25, -7 ≤ l ≤ 9                                        |
| Reflections collected                | 30774                                                                         |
| Independent reflections              | 2604 [R <sub>int</sub> = 0.0286, R <sub>sigma</sub> = 0.0146]                 |
| Data/restraints/parameters           | 2604/0/93                                                                     |
| Goodness-of-fit on F <sup>2</sup>    | 1.040                                                                         |
| Final R indexes [I ≥ 2σ (I)]         | R <sub>1</sub> = 0.0172, wR <sub>2</sub> = 0.0424                             |
| Final R indexes [all data]           | R <sub>1</sub> = 0.0200, wR <sub>2</sub> = 0.0439                             |
| CCDC Number                          | 797580                                                                        |

**Table S.9.** Fractional Atomic Coordinates (×10<sup>4</sup>) and Equivalent Isotropic Displacement Parameters (Å<sup>2</sup>×10<sup>3</sup>) for **2**. U<sub>eq</sub> is defined as 1/3 of the trace of the orthogonalised U<sub>ij</sub> tensor.

| Atom | x           | y          | z           | U(eq)     |
|------|-------------|------------|-------------|-----------|
| Br1  | 3088.09(16) | 3671.69(6) | 1674.07(18) | 15.06(4)  |
| N1   | 6417.6(15)  | 1255.5(5)  | 2836.2(16)  | 12.08(19) |
| C1   | 7639.3(18)  | 1194.4(7)  | 1476.7(18)  | 13.3(2)   |
| C2   | 8839.6(17)  | 499.4(7)   | 1757.6(18)  | 13.7(2)   |
| C3   | 9423.8(17)  | 352.9(6)   | -89.3(18)   | 13.3(2)   |
| C4   | 5515(2)     | 1999.5(7)  | 2551(2)     | 19.5(3)   |
| C5   | 7617.2(19)  | 1165.8(8)  | 4975.3(19)  | 20.5(3)   |
| C6   | 4836.8(18)  | 698.4(7)   | 2306(2)     | 17.2(2)   |
| O1   | 354.1(18)   | 2275.2(7)  | 9008(2)     | 37.2(3)   |

**Table S.10.** Anisotropic Displacement Parameters ( $\text{\AA}^2 \times 10^3$ ) for **2**. The Anisotropic displacement factor exponent takes the form:  $-2\pi^2[h^2a^*2U_{11}+2hka^*b^*U_{12}+\dots]$ .

| Atom | $U_{11}$ | $U_{22}$ | $U_{33}$ | $U_{12}$ | $U_{13}$ | $U_{23}$ |
|------|----------|----------|----------|----------|----------|----------|
| Br1  | 15.15(6) | 14.48(6) | 16.07(7) | 0.57(4)  | 5.76(5)  | -0.90(4) |
| N1   | 12.6(4)  | 12.7(4)  | 11.7(4)  | 1.0(3)   | 4.9(4)   | -0.7(4)  |
| C1   | 14.5(5)  | 13.6(5)  | 13.8(5)  | 1.5(4)   | 7.6(4)   | 0.6(4)   |
| C2   | 15.0(5)  | 13.8(5)  | 13.3(5)  | 2.8(4)   | 6.1(4)   | 1.0(4)   |
| C3   | 14.8(5)  | 13.2(5)  | 13.5(5)  | 1.0(4)   | 6.7(4)   | 0.8(4)   |
| C4   | 24.0(6)  | 13.4(5)  | 24.3(6)  | 5.9(5)   | 12.1(5)  | 0.5(5)   |
| C5   | 16.8(6)  | 33.4(7)  | 10.5(5)  | 3.2(5)   | 3.3(4)   | -0.0(5)  |
| C6   | 15.6(5)  | 17.0(6)  | 20.6(6)  | -3.5(5)  | 8.1(5)   | -2.8(5)  |
| O1   | 29.6(6)  | 34.8(6)  | 47.2(7)  | -2.5(5)  | 12.6(5)  | -11.3(6) |

**Table S.11.** Bond Lengths for **2**.

| Atom | Atom | Length/\AA | Atom | Atom            | Length/\AA |
|------|------|------------|------|-----------------|------------|
| N1   | C1   | 1.5174(15) | C1   | C2              | 1.5223(16) |
| N1   | C4   | 1.4982(16) | C2   | C3              | 1.5274(17) |
| N1   | C5   | 1.4969(16) | C3   | C3 <sup>1</sup> | 1.526(2)   |
| N1   | C6   | 1.4975(16) |      |                 |            |

<sup>1</sup>2-X,-Y,-Z

**Table S.12.** Bond Angles for **2**.

| Atom | Atom | Atom | Angle/°    | Atom            | Atom | Atom | Angle/°    |
|------|------|------|------------|-----------------|------|------|------------|
| C4   | N1   | C1   | 107.86(9)  | C6              | N1   | C5   | 109.52(10) |
| C5   | N1   | C1   | 111.18(10) | C2              | C1   | N1   | 114.42(10) |
| C5   | N1   | C4   | 109.02(10) | C3              | C2   | C1   | 110.16(9)  |
| C6   | N1   | C1   | 111.00(9)  | C3 <sup>1</sup> | C3   | C2   | 112.24(12) |
| C6   | N1   | C4   | 108.17(10) |                 |      |      |            |

<sup>1</sup>2-X,-Y,-Z



**Table S.13.** Hydrogen Atom Coordinates ( $\text{\AA}\times 10^4$ ) and Isotropic Displacement Parameters ( $\text{\AA}^2\times 10^3$ ) for **2**.

| Atom | x           | y         | z           | U(eq)   |
|------|-------------|-----------|-------------|---------|
| H1a  | 6781.8(18)  | 1217.3(7) | 76.6(18)    | 15.9(3) |
| H1b  | 8514.9(18)  | 1621.0(7) | 1710.1(18)  | 15.9(3) |
| H2a  | 10007.4(17) | 551.8(7)  | 2937.1(18)  | 16.4(3) |
| H2b  | 8083.6(17)  | 81.1(7)   | 1992.4(18)  | 16.4(3) |
| H3a  | 8250.8(17)  | 321.6(6)  | -1270.6(18) | 16.0(3) |
| H3b  | 10207.1(17) | 767.5(6)  | -294.3(18)  | 16.0(3) |
| H4a  | 4749(13)    | 2066(2)   | 1147(4)     | 29.3(4) |
| H4b  | 4679(13)    | 2047(2)   | 3379(13)    | 29.3(4) |
| H4c  | 6527(2)     | 2372.7(7) | 2940(16)    | 29.3(4) |
| H5a  | 6820(4)     | 1256(6)   | 5826(2)     | 30.8(4) |
| H5b  | 8130(13)    | 667(2)    | 5195(4)     | 30.8(4) |
| H5c  | 8686(9)     | 1516(4)   | 5305(5)     | 30.8(4) |
| H6a  | 4023(9)     | 768(4)    | 3150(11)    | 25.8(3) |
| H6b  | 4055(9)     | 756(4)    | 904(5)      | 25.8(3) |
| H6c  | 5397.6(18)  | 206.8(7)  | 2518(15)    | 25.8(3) |
| H1c  | 1320(40)    | 2644(15)  | 9840(40)    | 71(8)   |
| H1d  | 1320(50)    | 2030(20)  | 8230(50)    | 127(13) |

**Table S.14.** Crystal data and structure refinement for **3**.

|                                      |                                                                  |
|--------------------------------------|------------------------------------------------------------------|
| Identification code                  | <b>3</b>                                                         |
| Empirical formula                    | C <sub>13</sub> H <sub>34</sub> N <sub>2</sub> Br <sub>2</sub> O |
| Formula weight                       | 394.24                                                           |
| Temperature/K                        | 93(2)                                                            |
| Crystal system                       | monoclinic                                                       |
| Space group                          | P2 <sub>1</sub> /n                                               |
| a/Å                                  | 9.270(2)                                                         |
| b/Å                                  | 11.720(3)                                                        |
| c/Å                                  | 16.537(4)                                                        |
| α/°                                  | 90.00                                                            |
| β/°                                  | 92.20(3)                                                         |
| γ/°                                  | 90.00                                                            |
| Volume/Å <sup>3</sup>                | 1795.3(7)                                                        |
| Z                                    | 4                                                                |
| ρ <sub>calc</sub> /g/cm <sup>3</sup> | 1.459                                                            |
| μ/mm <sup>-1</sup>                   | 4.510                                                            |
| F(000)                               | 816.0                                                            |
| Crystal size/mm <sup>3</sup>         | 0.32 × 0.05 × 0.01                                               |
| Radiation                            | MoKα (λ = 0.71073)                                               |
| 2θ range for data collection/°       | 4.26 to 50.06                                                    |
| Index ranges                         | -10 ≤ h ≤ 11, -13 ≤ k ≤ 13, -19 ≤ l ≤ 19                         |
| Reflections collected                | 14875                                                            |
| Independent reflections              | 3154 [R <sub>int</sub> = 0.1308, R <sub>sigma</sub> = 0.1329]    |
| Data/restraints/parameters           | 3154/0/171                                                       |
| Goodness-of-fit on F <sup>2</sup>    | 0.953                                                            |
| Final R indexes [I >= 2σ (I)]        | R <sub>1</sub> = 0.0503, wR <sub>2</sub> = 0.0894                |
| Final R indexes [all data]           | R <sub>1</sub> = 0.1293, wR <sub>2</sub> = 0.1117                |
| CCDC Number                          | 2118170                                                          |

**Table S.15.** Fractional Atomic Coordinates ( $\times 10^4$ ) and Equivalent Isotropic Displacement Parameters ( $\text{\AA}^2 \times 10^3$ ) for **3**.  $U_{eq}$  is defined as 1/3 of the trace of the orthogonalised  $U_{ij}$  tensor.

| Atom | X         | y         | z         | U(eq)    |
|------|-----------|-----------|-----------|----------|
| Br1  | 7452.6(7) | 5728.1(6) | 1146.8(4) | 23.6(2)  |
| Br2  | 2853.4(8) | -597.2(6) | 1123.9(4) | 24.8(2)  |
| N1   | 2053(6)   | 5732(5)   | 1140(3)   | 20.2(13) |
| N2   | -1663(6)  | -684(5)   | 1589(3)   | 19.4(13) |
| C1   | 1322(8)   | 4584(6)   | 990(4)    | 23.7(18) |
| C2   | 1780(8)   | 3631(6)   | 1575(4)   | 24.1(18) |
| C3   | 948(8)    | 2523(6)   | 1344(4)   | 26.0(19) |
| C4   | -588(8)   | 2529(6)   | 1603(4)   | 26.5(19) |
| C5   | -1484(8)  | 1481(6)   | 1315(4)   | 22.2(18) |
| C6   | -932(7)   | 437(6)    | 1796(4)   | 23.9(18) |
| C7   | 3639(8)   | 5659(6)   | 1087(4)   | 29.7(18) |
| C8   | 1471(8)   | 6521(6)   | 494(4)    | 26.1(19) |
| C9   | 1648(8)   | 6209(6)   | 1944(4)   | 28.1(19) |
| C10  | -1272(8)  | -1086(6)  | 760(4)    | 26.6(19) |
| C11  | -1110(8)  | -1529(6)  | 2196(4)   | 27.7(19) |
| C12  | -3266(7)  | -614(7)   | 1620(4)   | 25.2(17) |
| C13  | 4884(8)   | 2366(7)   | 575(4)    | 37(2)    |
| O1   | 4689(6)   | 1849(4)   | 1349(3)   | 30.8(13) |

**Table S.16.** Anisotropic Displacement Parameters ( $\text{\AA}^2 \times 10^3$ ) for **3**. The Anisotropic displacement factor exponent takes the form:  $-2\pi^2[h^2a^*U_{11}+2hka^*b^*U_{12}+\dots]$ .

| Atom | $U_{11}$ | $U_{22}$ | $U_{33}$ | $U_{23}$ | $U_{13}$ | $U_{12}$ |
|------|----------|----------|----------|----------|----------|----------|
| Br1  | 28.7(5)  | 26.6(4)  | 15.6(4)  | -0.5(4)  | 1.9(3)   | -0.2(4)  |
| Br2  | 30.9(5)  | 25.9(4)  | 17.4(4)  | -2.1(4)  | -0.7(3)  | 0.1(4)   |
| N1   | 22(4)    | 22(3)    | 17(3)    | -1(3)    | -4(2)    | 0(3)     |
| N2   | 28(4)    | 17(3)    | 13(3)    | 1(3)     | 3(2)     | -1(3)    |
| C1   | 33(5)    | 28(5)    | 10(4)    | 0(3)     | -1(3)    | -1(4)    |
| C2   | 29(5)    | 21(5)    | 22(4)    | 0(3)     | 1(3)     | 3(3)     |
| C3   | 42(6)    | 23(5)    | 12(4)    | -1(3)    | 2(3)     | 1(4)     |
| C4   | 34(5)    | 19(4)    | 27(4)    | 11(3)    | 5(3)     | -2(3)    |
| C5   | 19(5)    | 28(5)    | 20(4)    | -2(3)    | -1(3)    | 0(3)     |
| C6   | 28(5)    | 25(5)    | 19(4)    | 0(3)     | -3(3)    | -4(3)    |
| C7   | 40(5)    | 27(5)    | 22(4)    | 3(4)     | -2(3)    | 0(4)     |
| C8   | 36(5)    | 28(5)    | 14(4)    | 4(3)     | -6(3)    | 3(4)     |
| C9   | 44(6)    | 23(4)    | 17(4)    | -8(3)    | 2(4)     | -1(4)    |
| C10  | 41(5)    | 22(4)    | 18(4)    | -3(3)    | 4(4)     | 6(3)     |
| C11  | 42(6)    | 22(5)    | 19(4)    | 2(3)     | 1(3)     | 5(4)     |
| C12  | 29(5)    | 31(5)    | 15(4)    | 2(4)     | 3(3)     | 1(4)     |
| C13  | 46(6)    | 46(6)    | 19(4)    | 4(4)     | 7(4)     | -3(4)    |
| O1   | 41(4)    | 29(3)    | 22(3)    | 2(2)     | 0(2)     | -2(3)    |

**Table S.17.** Bond Lengths for **3**.

| Atom | Atom | Length/Å | Atom | Atom | Length/Å |
|------|------|----------|------|------|----------|
| N1   | C1   | 1.522(8) | N2   | C12  | 1.491(8) |
| N1   | C7   | 1.479(8) | C1   | C2   | 1.526(9) |
| N1   | C8   | 1.497(8) | C2   | C3   | 1.551(9) |
| N1   | C9   | 1.503(8) | C3   | C4   | 1.503(9) |
| N2   | C6   | 1.511(8) | C4   | C5   | 1.548(9) |
| N2   | C10  | 1.508(8) | C5   | C6   | 1.537(9) |
| N2   | C11  | 1.487(8) | C13  | O1   | 1.435(7) |

**Table S.18.** Bond Angles for **3**.

| Atom | Atom | Atom | Angle/°  | Atom | Atom | Atom | Angle/°  |
|------|------|------|----------|------|------|------|----------|
| C7   | N1   | C1   | 112.1(6) | C11  | N2   | C12  | 109.3(5) |
| C7   | N1   | C8   | 109.0(5) | C12  | N2   | C6   | 112.5(5) |
| C7   | N1   | C9   | 110.9(5) | C12  | N2   | C10  | 108.8(5) |
| C8   | N1   | C1   | 106.5(5) | N1   | C1   | C2   | 115.7(6) |
| C8   | N1   | C9   | 107.8(5) | C1   | C2   | C3   | 109.5(6) |
| C9   | N1   | C1   | 110.3(5) | C4   | C3   | C2   | 113.2(6) |
| C10  | N2   | C6   | 110.9(5) | C3   | C4   | C5   | 114.3(6) |
| C11  | N2   | C6   | 106.7(5) | C6   | C5   | C4   | 107.9(6) |
| C11  | N2   | C10  | 108.5(5) | N2   | C6   | C5   | 115.9(6) |

**Table S.19.** Torsion Angles for **3**.

| A  | B  | C  | D  | Angle/°   | A   | B  | C  | D  | Angle/°   |
|----|----|----|----|-----------|-----|----|----|----|-----------|
| N1 | C1 | C2 | C3 | -179.9(6) | C8  | N1 | C1 | C2 | 178.9(6)  |
| C1 | C2 | C3 | C4 | -76.8(7)  | C9  | N1 | C1 | C2 | -64.4(7)  |
| C2 | C3 | C4 | C5 | 174.9(6)  | C10 | N2 | C6 | C5 | 69.7(7)   |
| C3 | C4 | C5 | C6 | 70.9(7)   | C11 | N2 | C6 | C5 | -172.4(5) |
| C4 | C5 | C6 | N2 | -179.0(6) | C12 | N2 | C6 | C5 | -52.5(7)  |
| C7 | N1 | C1 | C2 | 59.7(7)   |     |    |    |    |           |

**Table S.20.** Hydrogen Atom Coordinates ( $\text{\AA}\times 10^4$ ) and Isotropic Displacement Parameters ( $\text{\AA}^2\times 10^3$ ) for **3**.

| Atom | x     | y     | z    | U(eq) |
|------|-------|-------|------|-------|
| H1A  | 1519  | 4336  | 439  | 28    |
| H1B  | 277   | 4690  | 1018 | 28    |
| H2A  | 1571  | 3853  | 2129 | 29    |
| H2B  | 2821  | 3499  | 1549 | 29    |
| H3A  | 954   | 2421  | 756  | 31    |
| H3B  | 1452  | 1871  | 1595 | 31    |
| H4A  | -1062 | 3222  | 1393 | 32    |
| H4B  | -587  | 2564  | 2195 | 32    |
| H5A  | -2510 | 1607  | 1408 | 27    |
| H5B  | -1373 | 1357  | 734  | 27    |
| H6A  | 103   | 354   | 1712 | 29    |
| H6B  | -1046 | 589   | 2373 | 29    |
| H7A  | 4057  | 6412  | 1161 | 45    |
| H7B  | 3876  | 5365  | 560  | 45    |
| H7C  | 4024  | 5152  | 1506 | 45    |
| H8A  | 429   | 6564  | 520  | 39    |
| H8B  | 1724  | 6235  | -32  | 39    |
| H8C  | 1883  | 7275  | 577  | 39    |
| H9A  | 2020  | 5716  | 2374 | 42    |
| H9B  | 605   | 6253  | 1964 | 42    |
| H9C  | 2057  | 6966  | 2012 | 42    |
| H10A | -1700 | -579  | 353  | 40    |
| H10B | -1633 | -1854 | 671  | 40    |
| H10C | -230  | -1082 | 721  | 40    |
| H11A | -63   | -1529 | 2210 | 42    |
| H11B | -1464 | -2283 | 2049 | 42    |
| H11C | -1444 | -1326 | 2726 | 42    |
| H12A | -3531 | -394  | 2160 | 38    |
| H12B | -3684 | -1353 | 1487 | 38    |
| H12C | -3627 | -51   | 1233 | 38    |
| H13A | 3951  | 2577  | 334  | 55    |
| H13B | 5353  | 1829  | 224  | 55    |
| H13C | 5479  | 3043  | 642  | 55    |
| H1   | 4183  | 1268  | 1291 | 46    |

**Table S.21.** Crystal data and structure refinement for **4**.

|                                      |                                                                |
|--------------------------------------|----------------------------------------------------------------|
| Identification code                  | <b>4</b>                                                       |
| Empirical formula                    | C <sub>14</sub> H <sub>33</sub> N <sub>3</sub> Br <sub>2</sub> |
| Formula weight                       | 403.25                                                         |
| Temperature/K                        | 103(2)                                                         |
| Crystal system                       | monoclinic                                                     |
| Space group                          | P2 <sub>1</sub> /c                                             |
| a/Å                                  | 12.4309(10)                                                    |
| b/Å                                  | 9.5074(8)                                                      |
| c/Å                                  | 15.9984(13)                                                    |
| α/°                                  | 90.00                                                          |
| β/°                                  | 94.584(5)                                                      |
| γ/°                                  | 90.00                                                          |
| Volume/Å <sup>3</sup>                | 1884.7(3)                                                      |
| Z                                    | 4                                                              |
| ρ <sub>calc</sub> /g/cm <sup>3</sup> | 1.421                                                          |
| μ/mm <sup>-1</sup>                   | 4.296                                                          |
| F(000)                               | 832.0                                                          |
| Crystal size/mm <sup>3</sup>         | 0.62 × 0.2 × 0.18                                              |
| Radiation                            | MoKα (λ = 0.71073)                                             |
| 2θ range for data collection/°       | 4.98 to 69.44                                                  |
| Index ranges                         | -19 ≤ h ≤ 19, -14 ≤ k ≤ 14, -25 ≤ l ≤ 25                       |
| Reflections collected                | 44615                                                          |
| Independent reflections              | 6920 [R <sub>int</sub> = 0.0610, R <sub>sigma</sub> = 0.0474]  |
| Data/restraints/parameters           | 6920/0/180                                                     |
| Goodness-of-fit on F <sup>2</sup>    | 1.112                                                          |
| Final R indexes [I ≥ 2σ (I)]         | R <sub>1</sub> = 0.0503, wR <sub>2</sub> = 0.1438              |
| Final R indexes [all data]           | R <sub>1</sub> = 0.0684, wR <sub>2</sub> = 0.1519              |
| CCDC Number                          | 952025                                                         |

**Table S.22.** Fractional Atomic Coordinates ( $\times 10^4$ ) and Equivalent Isotropic Displacement Parameters ( $\text{\AA}^2 \times 10^3$ ) for **4**.  $U_{\text{eq}}$  is defined as 1/3 of the trace of the orthogonalised  $U_{ij}$  tensor.

| Atom | X         | y         | z          | U(eq)     |
|------|-----------|-----------|------------|-----------|
| Br1  | 837.2(3)  | 2795.5(5) | 1098.9(2)  | 15.72(10) |
| Br2  | 3900.8(4) | 7767.8(5) | 1210.9(2)  | 17.89(10) |
| N1   | 4277(3)   | 2462(3)   | 1211(2)    | 10.8(6)   |
| N2   | 10642(3)  | -1851(3)  | 1535.5(19) | 11.4(6)   |
| C1   | 5487(4)   | 2368(4)   | 1231(3)    | 15.3(7)   |
| C6   | 7132(3)   | 880(4)    | 1259(2)    | 14.7(7)   |
| C2   | 5963(3)   | 926(4)    | 1458(3)    | 16.3(7)   |
| C4   | 8872(3)   | -507(4)   | 1276(2)    | 14.8(7)   |
| C5   | 9417(3)   | -1880(4)  | 1548(2)    | 14.5(7)   |
| C11  | 11025(4)  | -3324(5)  | 1647(3)    | 20.2(8)   |
| C7   | 3749(4)   | 1688(5)   | 465(2)     | 18.7(8)   |
| C8   | 3989(4)   | 3990(5)   | 1130(3)    | 27.2(10)  |
| C10  | 11157(4)  | -959(5)   | 2226(2)    | 17.7(8)   |
| C9   | 3850(3)   | 1876(5)   | 1995(2)    | 17.2(8)   |
| C3   | 7713(3)   | -457(4)   | 1549(2)    | 13.3(7)   |
| C12  | 10969(3)  | -1314(4)  | 710(2)     | 14.2(7)   |
| N3   | 2979(4)   | 10679(5)  | 3587(2)    | 29.6(9)   |
| C13  | 2504(3)   | 10120(5)  | 4080(2)    | 18.0(8)   |
| C14  | 1912(4)   | 9398(5)   | 4698(2)    | 19.4(8)   |

**Table S.23.** Anisotropic Displacement Parameters ( $\text{\AA}^2 \times 10^3$ ) for **4**. The Anisotropic displacement factor exponent takes the form:  $-2\pi^2[h^2a^{*2}U_{11}+2hka^*b^*U_{12}+\dots]$ .

| Atom | $U_{11}$ | $U_{22}$  | $U_{33}$  | $U_{23}$  | $U_{13}$  | $U_{12}$  |
|------|----------|-----------|-----------|-----------|-----------|-----------|
| Br1  | 13.4(2)  | 13.96(18) | 19.79(16) | -0.46(16) | 1.18(14)  | 0.27(17)  |
| Br2  | 14.1(2)  | 14.40(19) | 24.65(18) | 1.33(17)  | -1.38(15) | -0.06(17) |
| N1   | 3.3(14)  | 7.3(15)   | 22.4(14)  | 2.9(11)   | 3.6(11)   | 1.0(11)   |
| N2   | 10.6(15) | 9.5(14)   | 13.9(12)  | 1.0(11)   | -0.1(10)  | -0.9(11)  |
| C1   | 12.7(18) | 10.7(17)  | 22.0(16)  | -1.5(14)  | -2.2(14)  | -0.4(15)  |
| C6   | 8.1(17)  | 13.6(18)  | 21.7(17)  | 1.6(15)   | -2.8(13)  | -3.9(15)  |
| C2   | 11.8(18) | 12.2(17)  | 24.7(18)  | 0.9(14)   | 0.6(15)   | 0.1(16)   |
| C4   | 10.3(17) | 17.9(18)  | 16.2(15)  | 2.5(13)   | 0.8(13)   | 2.0(16)   |
| C5   | 10.8(17) | 13.1(17)  | 19.8(16)  | 2.8(13)   | 2.7(14)   | -1.7(15)  |
| C11  | 14.3(19) | 14.1(19)  | 32(2)     | 8.2(17)   | 2.9(16)   | 0.1(17)   |
| C7   | 13.7(18) | 21(2)     | 21.0(17)  | -4.3(15)  | -1.5(15)  | 2.8(17)   |
| C8   | 27(3)    | 13(2)     | 42(3)     | 3.3(18)   | 5(2)      | 4.3(19)   |
| C10  | 17(2)    | 18.2(19)  | 17.0(16)  | -0.7(14)  | -4.3(14)  | -2.4(16)  |
| C9   | 9.6(17)  | 23(2)     | 18.8(16)  | 1.6(14)   | 2.2(13)   | 3.0(16)   |
| C3   | 8.2(18)  | 14.5(18)  | 17.4(15)  | 1.0(14)   | 1.7(13)   | -0.6(14)  |
| C12  | 9.3(17)  | 20.4(19)  | 13.2(15)  | 0.7(14)   | 2.8(12)   | 1.1(15)   |
| N3   | 31(2)    | 35(2)     | 23.2(18)  | 1.0(17)   | 5.0(17)   | -4(2)     |
| C13  | 16(2)    | 22(2)     | 16.2(16)  | -2.2(15)  | -0.9(14)  | 2.8(18)   |
| C14  | 19(2)    | 18.2(19)  | 20.9(17)  | 0.5(15)   | 3.7(15)   | -3.4(17)  |

**Table S.24.** Bond Lengths for **4**.

| Atom | Atom | Length/Å | Atom | Atom | Length/Å |
|------|------|----------|------|------|----------|
| N1   | C1   | 1.504(5) | C1   | C2   | 1.526(6) |
| N1   | C7   | 1.508(5) | C6   | C2   | 1.513(6) |
| N1   | C8   | 1.499(5) | C6   | C3   | 1.516(6) |
| N1   | C9   | 1.507(5) | C4   | C5   | 1.518(6) |
| N2   | C5   | 1.525(5) | C4   | C3   | 1.539(5) |
| N2   | C11  | 1.485(5) | N3   | C13  | 1.151(6) |
| N2   | C10  | 1.495(5) | C13  | C14  | 1.451(6) |
| N2   | C12  | 1.501(5) |      |      |          |

**Table S.25.** Bond Angles for **4**.

| Atom | Atom | Atom | Angle/°  | Atom | Atom | Atom | Angle/°  |
|------|------|------|----------|------|------|------|----------|
| C1   | N1   | C7   | 111.1(3) | C10  | N2   | C12  | 109.1(3) |
| C1   | N1   | C9   | 112.2(3) | C12  | N2   | C5   | 111.0(3) |
| C8   | N1   | C1   | 106.9(3) | N1   | C1   | C2   | 115.3(3) |
| C8   | N1   | C7   | 108.6(3) | C2   | C6   | C3   | 113.7(3) |
| C8   | N1   | C9   | 109.4(3) | C6   | C2   | C1   | 109.7(4) |
| C9   | N1   | C7   | 108.6(3) | C5   | C4   | C3   | 110.6(3) |
| C11  | N2   | C5   | 107.0(3) | C4   | C5   | N2   | 113.9(3) |
| C11  | N2   | C10  | 109.4(3) | C6   | C3   | C4   | 111.9(3) |
| C11  | N2   | C12  | 108.6(3) | N3   | C13  | C14  | 179.3(5) |
| C10  | N2   | C5   | 111.7(3) |      |      |      |          |

**Table S.26.** Torsion Angles for **4**.

| A   | B  | C  | D  | Angle/°   | A   | B  | C  | D  | Angle/°   |
|-----|----|----|----|-----------|-----|----|----|----|-----------|
| N1  | C1 | C2 | C6 | 166.7(3)  | C10 | N2 | C5 | C4 | 71.5(4)   |
| C2  | C6 | C3 | C4 | 175.8(3)  | C9  | N1 | C1 | C2 | 50.2(4)   |
| C5  | C4 | C3 | C6 | -178.0(3) | C3  | C6 | C2 | C1 | 173.8(3)  |
| C11 | N2 | C5 | C4 | -168.9(3) | C3  | C4 | C5 | N2 | -163.2(3) |
| C7  | N1 | C1 | C2 | -71.5(4)  | C12 | N2 | C5 | C4 | -50.5(4)  |
| C8  | N1 | C1 | C2 | 170.2(3)  |     |    |    |    |           |



**Table S.27.** Hydrogen Atom Coordinates ( $\text{\AA}\times 10^4$ ) and Isotropic Displacement Parameters ( $\text{\AA}^2\times 10^3$ ) for **4**.

| Atom | x     | y     | z    | U(eq) |
|------|-------|-------|------|-------|
| H1A  | 5802  | 3063  | 1642 | 18    |
| H1B  | 5710  | 2638  | 673  | 18    |
| H6A  | 7516  | 1695  | 1528 | 18    |
| H6B  | 7165  | 974   | 645  | 18    |
| H2A  | 5913  | 742   | 2063 | 20    |
| H2B  | 5549  | 188   | 1137 | 20    |
| H4A  | 8855  | -417  | 659  | 18    |
| H4B  | 9291  | 292   | 1530 | 18    |
| H5A  | 9126  | -2641 | 1173 | 17    |
| H5B  | 9232  | -2106 | 2123 | 17    |
| H11A | 10702 | -3905 | 1187 | 30    |
| H11B | 10812 | -3690 | 2182 | 30    |
| H11C | 11813 | -3350 | 1645 | 30    |
| H7A  | 4019  | 2058  | -50  | 28    |
| H7B  | 2965  | 1818  | 444  | 28    |
| H7C  | 3918  | 683   | 515  | 28    |
| H8A  | 4250  | 4365  | 613  | 41    |
| H8B  | 4325  | 4506  | 1612 | 41    |
| H8C  | 3203  | 4096  | 1111 | 41    |
| H10A | 10908 | -1263 | 2763 | 26    |
| H10B | 10958 | 27    | 2125 | 26    |
| H10C | 11944 | -1056 | 2243 | 26    |
| H9A  | 3079  | 2091  | 1996 | 26    |
| H9B  | 4239  | 2302  | 2488 | 26    |
| H9C  | 3954  | 855   | 2011 | 26    |
| H3A  | 7305  | -1280 | 1313 | 16    |
| H3B  | 7735  | -518  | 2167 | 16    |
| H12A | 11752 | -1412 | 692  | 21    |
| H12B | 10769 | -321  | 647  | 21    |
| H12C | 10600 | -1860 | 253  | 21    |
| H14A | 2406  | 8797  | 5045 | 29    |
| H14B | 1343  | 8819  | 4411 | 29    |
| H14C | 1585  | 10092 | 5053 | 29    |

**Table S.28.** Crystal data and structure refinement for **5**.

|                                      |                                                               |
|--------------------------------------|---------------------------------------------------------------|
| Identification code                  | <b>5</b>                                                      |
| Empirical formula                    | C <sub>14</sub> H <sub>33</sub> N <sub>3</sub> I <sub>2</sub> |
| Formula weight                       | 497.23                                                        |
| Temperature/K                        | 103(2)                                                        |
| Crystal system                       | monoclinic                                                    |
| Space group                          | P2 <sub>1</sub> /n                                            |
| a/Å                                  | 9.920(2)                                                      |
| b/Å                                  | 12.776(2)                                                     |
| c/Å                                  | 16.440(3)                                                     |
| α/°                                  | 90.00                                                         |
| β/°                                  | 96.07(2)                                                      |
| γ/°                                  | 90.00                                                         |
| Volume/Å <sup>3</sup>                | 2071.9(7)                                                     |
| Z                                    | 4                                                             |
| ρ <sub>calc</sub> /g/cm <sup>3</sup> | 1.594                                                         |
| μ/mm <sup>-1</sup>                   | 3.031                                                         |
| F(000)                               | 976.0                                                         |
| Crystal size/mm <sup>3</sup>         | 0.14 × 0.08 × 0.04                                            |
| Radiation                            | MoKα (λ = 0.71073)                                            |
| 2θ range for data collection/°       | 4.04 to 61.02                                                 |
| Index ranges                         | -13 ≤ h ≤ 14, -17 ≤ k ≤ 18, -23 ≤ l ≤ 23                      |
| Reflections collected                | 21599                                                         |
| Independent reflections              | 6177 [R <sub>int</sub> = 0.0489, R <sub>sigma</sub> = 0.0631] |
| Data/restraints/parameters           | 6177/0/173                                                    |
| Goodness-of-fit on F <sup>2</sup>    | 0.973                                                         |
| Final R indexes [I ≥ 2σ (I)]         | R <sub>1</sub> = 0.0372, wR <sub>2</sub> = 0.0607             |
| Final R indexes [all data]           | R <sub>1</sub> = 0.0703, wR <sub>2</sub> = 0.0686             |
| CCDC Number                          | 952023                                                        |

**Table S.29** Fractional Atomic Coordinates ( $\times 10^4$ ) and Equivalent Isotropic Displacement Parameters ( $\text{\AA}^2 \times 10^3$ ) for **5**.  $U_{eq}$  is defined as 1/3 of the trace of the orthogonalised  $U_{ij}$  tensor.

| Atom | x         | y           | z           | U(eq)    |
|------|-----------|-------------|-------------|----------|
| I1   | 7314.6(2) | 793.36(18)  | 1216.51(13) | 21.80(6) |
| I2   | 2389.1(2) | 3749.47(18) | 1114.33(13) | 23.35(7) |
| N1   | 7712(3)   | 4226(2)     | 1280.3(16)  | 22.4(7)  |
| N2   | 12043(3)  | 10351(2)    | 1403.4(15)  | 18.0(6)  |
| C1   | 7829(3)   | 5406(3)     | 1327(2)     | 23.9(8)  |
| C2   | 9238(4)   | 5845(3)     | 1284(2)     | 26.3(8)  |
| C3   | 9226(4)   | 7025(3)     | 1426(2)     | 25.1(8)  |
| C4   | 10586(4)  | 7537(3)     | 1353(2)     | 26.7(8)  |
| C5   | 10585(4)  | 8713(3)     | 1487(2)     | 23.9(8)  |
| C6   | 11969(3)  | 9170(3)     | 1409(2)     | 21.6(7)  |
| C7   | 13518(3)  | 10641(3)    | 1410(2)     | 29.0(9)  |
| C8   | 11500(4)  | 10831(3)    | 2135.3(18)  | 23.6(8)  |
| C9   | 11278(3)  | 10798(3)    | 645.6(18)   | 22.4(8)  |
| C10  | 8523(4)   | 3721(3)     | 2001(2)     | 29.6(9)  |
| C11  | 6246(4)   | 3965(3)     | 1304(3)     | 37.9(10) |
| C12  | 8167(4)   | 3808(3)     | 508(2)      | 28.6(9)  |
| N3   | 5411(5)   | 2986(4)     | 8513(3)     | 79.9(15) |
| C13  | 4953(4)   | 2522(3)     | 8997(2)     | 35.6(10) |
| C14  | 4381(4)   | 1929(3)     | 9622(2)     | 30.5(9)  |

**Table S.30.** Anisotropic Displacement Parameters ( $\text{\AA}^2 \times 10^3$ ) for **5**. The Anisotropic displacement factor exponent takes the form:  $-2\pi^2[h^2a^*2U_{11}+2hka^*b^*U_{12}+\dots]$ .

| Atom | $U_{11}$  | $U_{22}$  | $U_{33}$  | $U_{23}$ | $U_{13}$ | $U_{12}$  |
|------|-----------|-----------|-----------|----------|----------|-----------|
| I1   | 19.65(13) | 19.40(12) | 26.53(11) | 0.88(9)  | 3.27(9)  | -1.22(10) |
| I2   | 23.85(14) | 20.28(13) | 25.88(11) | -2.79(9) | 2.48(9)  | -1.57(11) |
| N1   | 27.0(18)  | 16.0(15)  | 24.6(14)  | -1.1(11) | 4.9(13)  | -7.4(13)  |
| N2   | 16.3(15)  | 17.8(15)  | 19.5(13)  | 0.2(11)  | -0.8(11) | -4.0(13)  |
| C1   | 29(2)     | 13.6(17)  | 29.8(18)  | -0.5(14) | 7.1(16)  | -2.5(16)  |
| C2   | 28(2)     | 18.8(19)  | 32.1(18)  | -0.6(15) | 2.6(16)  | -4.6(17)  |
| C3   | 25(2)     | 16.9(19)  | 33.4(18)  | -0.2(15) | 4.5(16)  | -3.5(16)  |
| C4   | 24(2)     | 18.3(19)  | 37(2)     | -1.9(16) | 0.8(17)  | -0.3(16)  |
| C5   | 24(2)     | 17.8(18)  | 30.7(17)  | -1.0(15) | 5.8(15)  | -0.1(16)  |
| C6   | 25(2)     | 15.2(17)  | 24.9(16)  | -0.6(14) | 2.6(14)  | -0.4(16)  |
| C7   | 17(2)     | 32(2)     | 38(2)     | -2.9(16) | 0.5(16)  | -7.2(17)  |
| C8   | 32(2)     | 18.8(18)  | 20.9(15)  | -2.5(14) | 5.0(15)  | -3.6(16)  |
| C9   | 25(2)     | 22.8(19)  | 18.2(15)  | 0.2(14)  | -1.0(14) | -1.3(16)  |
| C10  | 45(3)     | 19.8(19)  | 23.6(17)  | 2.3(15)  | 3.7(17)  | -4.0(18)  |
| C11  | 24(2)     | 31(2)     | 60(3)     | -4(2)    | 13(2)    | -7.9(19)  |
| C12  | 36(2)     | 24(2)     | 27.4(17)  | -2.7(15) | 8.4(16)  | -6.2(18)  |
| N3   | 79(3)     | 90(4)     | 78(3)     | 38(3)    | 39(3)    | 6(3)      |
| C13  | 31(2)     | 40(3)     | 36(2)     | 8.1(18)  | 5.9(19)  | 8(2)      |
| C14  | 31(2)     | 31(2)     | 28.7(18)  | 2.8(16)  | 3.6(16)  | -0.7(18)  |

**Table S.31.** Bond Lengths for **5**.

| Atom | Atom | Length/Å | Atom | Atom | Length/Å |
|------|------|----------|------|------|----------|
| N1   | C1   | 1.513(4) | C1   | C2   | 1.515(5) |
| N1   | C10  | 1.506(4) | C2   | C3   | 1.526(5) |
| N1   | C11  | 1.496(4) | C3   | C4   | 1.515(5) |
| N1   | C12  | 1.491(4) | C4   | C5   | 1.519(5) |
| N2   | C6   | 1.511(4) | C5   | C6   | 1.510(5) |
| N2   | C7   | 1.508(4) | N3   | C13  | 1.125(5) |
| N2   | C8   | 1.500(4) | C13  | C14  | 1.441(5) |
| N2   | C9   | 1.501(4) |      |      |          |

**Table S.32.** Bond Angles for **5**.

| Atom | Atom | Atom | Angle/°  | Atom | Atom | Atom | Angle/°  |
|------|------|------|----------|------|------|------|----------|
| C10  | N1   | C1   | 110.8(3) | C9   | N2   | C6   | 111.3(2) |
| C11  | N1   | C1   | 106.9(3) | C9   | N2   | C7   | 108.5(3) |
| C11  | N1   | C10  | 108.9(3) | N1   | C1   | C2   | 115.7(3) |
| C12  | N1   | C1   | 111.8(3) | C1   | C2   | C3   | 109.7(3) |
| C12  | N1   | C10  | 109.4(3) | C4   | C3   | C2   | 113.2(3) |
| C12  | N1   | C11  | 109.0(3) | C3   | C4   | C5   | 113.6(3) |
| C7   | N2   | C6   | 107.0(3) | C6   | C5   | C4   | 110.8(3) |
| C8   | N2   | C6   | 112.4(2) | C5   | C6   | N2   | 115.5(3) |
| C8   | N2   | C7   | 108.9(3) | N3   | C13  | C14  | 179.3(5) |
| C8   | N2   | C9   | 108.5(3) |      |      |      |          |

**Table S.33.** Torsion Angles for **5**.

| A  | B  | C  | D  | Angle/°   | A   | B  | C  | D  | Angle/°   |
|----|----|----|----|-----------|-----|----|----|----|-----------|
| N1 | C1 | C2 | C3 | -174.2(3) | C8  | N2 | C6 | C5 | 54.7(4)   |
| C1 | C2 | C3 | C4 | -177.2(3) | C9  | N2 | C6 | C5 | -67.4(4)  |
| C2 | C3 | C4 | C5 | 179.7(3)  | C10 | N1 | C1 | C2 | 63.4(4)   |
| C3 | C4 | C5 | C6 | 179.8(3)  | C11 | N1 | C1 | C2 | -178.1(3) |
| C4 | C5 | C6 | N2 | 171.1(3)  | C12 | N1 | C1 | C2 | -59.0(4)  |
| C7 | N2 | C6 | C5 | 174.2(3)  |     |    |    |    |           |

**Table S.34.** Hydrogen Atom Coordinates ( $\text{\AA}\times 10^4$ ) and Isotropic Displacement Parameters ( $\text{\AA}^2\times 10^3$ ) for **5**.

| Atom | x     | y     | z     | U(eq) |
|------|-------|-------|-------|-------|
| H1A  | 7502  | 5640  | 1845  | 29    |
| H1B  | 7217  | 5710  | 873   | 29    |
| H2A  | 9539  | 5694  | 741   | 32    |
| H2B  | 9882  | 5508  | 1705  | 32    |
| H3A  | 8538  | 7348  | 1022  | 30    |
| H3B  | 8956  | 7165  | 1978  | 30    |
| H4A  | 10858 | 7392  | 801   | 32    |
| H4B  | 11273 | 7216  | 1758  | 32    |
| H5A  | 9910  | 9044  | 1080  | 29    |
| H5B  | 10321 | 8867  | 2039  | 29    |
| H6A  | 12287 | 8906  | 896   | 26    |
| H6B  | 12605 | 8907  | 1868  | 26    |
| H7A  | 13608 | 11405 | 1407  | 44    |
| H7B  | 13873 | 10349 | 924   | 44    |
| H7C  | 14030 | 10357 | 1903  | 44    |
| H8A  | 10543 | 10641 | 2138  | 35    |
| H8B  | 11585 | 11594 | 2110  | 35    |
| H8C  | 12017 | 10570 | 2635  | 35    |
| H9A  | 10317 | 10615 | 632   | 34    |
| H9B  | 11642 | 10509 | 162   | 34    |
| H9C  | 11377 | 11561 | 648   | 34    |
| H10A | 8223  | 3994  | 2509  | 44    |
| H10B | 9487  | 3878  | 1986  | 44    |
| H10C | 8387  | 2961  | 1978  | 44    |
| H11A | 5937  | 4241  | 1808  | 57    |
| H11B | 6129  | 3203  | 1288  | 57    |
| H11C | 5712  | 4279  | 830   | 57    |
| H12A | 9124  | 3983  | 485   | 43    |
| H12B | 7621  | 4121  | 38    | 43    |
| H12C | 8054  | 3046  | 492   | 43    |
| H14A | 5113  | 1636  | 10001 | 46    |
| H14B | 3824  | 1360  | 9367  | 46    |
| H14C | 3817  | 2389  | 9922  | 46    |

## S.2.2. Parameters and data for X-Ray crystal structures 1, 2 and 5 refined by HAR.

**Table S.35.** Crystal data and structure refinement for **1'**.

|                                      |                                                                |
|--------------------------------------|----------------------------------------------------------------|
| Identification code                  | <b>1'</b>                                                      |
| Empirical formula                    | C <sub>12</sub> H <sub>30</sub> Br <sub>2</sub> N <sub>2</sub> |
| Formula weight                       | 362.20                                                         |
| Temperature/K                        | 93(2)                                                          |
| Crystal system                       | monoclinic                                                     |
| Space group                          | P2 <sub>1</sub> /c                                             |
| a/Å                                  | 5.4796(4)                                                      |
| b/Å                                  | 13.1109(11)                                                    |
| c/Å                                  | 11.5815(9)                                                     |
| α/°                                  | 90.000000(0)                                                   |
| β/°                                  | 93.580(4)                                                      |
| γ/°                                  | 90.000000(0)                                                   |
| Volume/Å <sup>3</sup>                | 830.42(11)                                                     |
| Z                                    | 2                                                              |
| ρ <sub>calc</sub> /g/cm <sup>3</sup> | 1.449                                                          |
| μ/mm <sup>-1</sup>                   | 4.864                                                          |
| F(000)                               | 372.0                                                          |
| Crystal size/mm <sup>3</sup>         | 0.12 × 0.1 × 0.06                                              |
| Radiation                            | MoKα (λ = 0.710730)                                            |
| 2θ range for data collection/°       | 6.22 to 65.58                                                  |
| Index ranges                         | -5 ≤ h ≤ 8, -18 ≤ k ≤ 19, -17 ≤ l ≤ 13                         |
| Reflections collected                | 13885                                                          |
| Independent reflections              | 2351 [R <sub>int</sub> = 0.0397, R <sub>sigma</sub> = 0.0365]  |
| Data/restraints/parameters           | 2351/0/133                                                     |
| Goodness-of-fit on F <sup>2</sup>    |                                                                |
| Final R indexes [I >= 2σ (I)]        | R <sub>1</sub> = 0.0243, wR <sub>2</sub> = 0.0161              |
| Final R indexes [all data]           | R <sub>1</sub> = 0.0243,                                       |
| CCDC Number                          | 2119853                                                        |

**Table S.36.** Anisotropic Displacement Parameters (Å<sup>2</sup>×10<sup>3</sup>) for **1'**. The Anisotropic displacement factor exponent takes the form: -2π<sup>2</sup>[h<sup>2</sup>a\*<sup>2</sup>U<sub>11</sub>+2hka\*b\*U<sub>12</sub>+...].

| Atom | U <sub>11</sub> | U <sub>22</sub> | U <sub>33</sub> | U <sub>12</sub> | U <sub>13</sub> | U <sub>23</sub> |
|------|-----------------|-----------------|-----------------|-----------------|-----------------|-----------------|
| N1   | 12.1(5)         | 11.1(5)         | 12.1(5)         | 0.7(4)          | 0.5(4)          | 0.0(4)          |
| C1   | 16.3(7)         | 11.0(6)         | 13.7(7)         | 0.7(5)          | -0.1(5)         | -0.7(5)         |
| C2   | 20.9(8)         | 10.6(6)         | 17.0(7)         | -0.5(5)         | -1.8(6)         | 0.5(5)          |
| C4   | 15.7(7)         | 13.0(6)         | 17.8(7)         | 3.3(5)          | 1.9(6)          | 0.9(6)          |
| C5   | 15.7(6)         | 14.4(6)         | 17.8(7)         | -1.8(6)         | 0.2(5)          | 1.2(6)          |
| C6   | 20.5(8)         | 15.4(7)         | 17.2(7)         | -2.6(6)         | -4.1(6)         | 0.8(6)          |
| C3   | 22.6(8)         | 11.4(7)         | 18.7(7)         | 1.4(5)          | 1.3(6)          | 1.5(6)          |
| Br1  | 14.65(6)        | 15.32(6)        | 13.59(6)        | 1.94(6)         | 0.82(4)         | 3.66(6)         |

**Table S.37.** Bond Lengths for **1'**.

| Atom | Atom | Length/Å   | Atom | Atom | Length/Å   |
|------|------|------------|------|------|------------|
| N1   | C1   | 1.5098(16) | N1   | C6   | 1.4914(16) |
| N1   | C4   | 1.4948(16) | C1   | C2   | 1.5150(18) |
| N1   | C5   | 1.4966(17) | C2   | C3   | 1.5234(19) |

**Table S.38.** Bond Angles for **1'**.

| Atom | Atom | Atom | Angle/°    | Atom | Atom | Atom | Angle/°    |
|------|------|------|------------|------|------|------|------------|
| C1   | N1   | C4   | 110.29(10) | C4   | N1   | C6   | 110.27(10) |
| C1   | N1   | C5   | 108.26(10) | C5   | N1   | C6   | 108.04(10) |
| C1   | N1   | C6   | 111.20(10) | N1   | C1   | C2   | 114.85(11) |
| C4   | N1   | C5   | 108.69(10) | C1   | C2   | C3   | 109.91(11) |

**Table S.39.** Selected Bond Lengths for **1'**.

| Atom | Atom | Length/Å   |
|------|------|------------|
| N1   | C1   | 1.5098(16) |
| N1   | C4   | 1.4948(16) |
| N1   | C5   | 1.4966(17) |
| N1   | C6   | 1.4914(16) |
| C1   | H1A  | 1.034(16)  |
| C1   | H1B  | 1.086(16)  |
| C1   | C2   | 1.5150(18) |
| C2   | H2A  | 1.055(17)  |
| C2   | H2B  | 1.075(16)  |
| C2   | C3   | 1.5234(19) |
| C4   | H4A  | 1.083(16)  |
| C4   | H4B  | 1.018(17)  |
| C4   | H4C  | 1.057(16)  |
| C5   | H5A  | 1.047(17)  |
| C5   | H5B  | 1.054(17)  |
| C5   | H5C  | 1.052(17)  |
| C6   | H6A  | 1.051(17)  |
| C6   | H6B  | 1.083(17)  |
| C6   | H6C  | 1.016(16)  |
| C3   | H3A  | 1.071(18)  |
| C3   | H3B  | 1.084(16)  |

**Table S.40.** Selected Angles for **1'**.

| Atom | Atom | Atom | Angle/°    | Atom | Atom | Atom | Angle/°   |
|------|------|------|------------|------|------|------|-----------|
| C1   | N1   | C4   | 110.29(10) | N1   | C4   | H4C  | 106.3(9)  |
| C1   | N1   | C5   | 108.26(10) | H4A  | C4   | H4B  | 111.3(12) |

| Atom | Atom | Atom | Angle/°    | Atom | Atom | Atom | Angle/°   |
|------|------|------|------------|------|------|------|-----------|
| C1   | N1   | C6   | 111.20(10) | H4A  | C4   | H4C  | 109.9(11) |
| C4   | N1   | C5   | 108.69(10) | H4B  | C4   | H4C  | 113.1(12) |
| C4   | N1   | C6   | 110.27(10) | N1   | C5   | H5A  | 107.2(9)  |
| C5   | N1   | C6   | 108.04(10) | N1   | C5   | H5B  | 107.6(9)  |
| N1   | C1   | H1A  | 104.9(9)   | N1   | C5   | H5C  | 107.9(9)  |
| N1   | C1   | H1B  | 106.4(9)   | H5A  | C5   | H5B  | 112.4(13) |
| N1   | C1   | C2   | 114.85(11) | H5A  | C5   | H5C  | 110.7(13) |
| H1A  | C1   | H1B  | 110.3(12)  | H5B  | C5   | H5C  | 110.7(12) |
| C2   | C1   | H1A  | 110.9(9)   | N1   | C6   | H6A  | 109.8(10) |
| C2   | C1   | H1B  | 109.3(9)   | N1   | C6   | H6B  | 106.3(9)  |
| C1   | C2   | H2A  | 109.6(9)   | N1   | C6   | H6C  | 106.1(9)  |
| C1   | C2   | H2B  | 111.4(9)   | H6A  | C6   | H6B  | 109.0(13) |
| C1   | C2   | C3   | 109.91(11) | H6A  | C6   | H6C  | 112.9(12) |
| H2A  | C2   | H2B  | 109.1(12)  | H6B  | C6   | H6C  | 112.8(13) |
| C3   | C2   | H2A  | 107.6(9)   | C2   | C3   | H3A  | 110.6(9)  |
| C3   | C2   | H2B  | 109.1(9)   | C2   | C3   | H3B  | 107.9(9)  |
| N1   | C4   | H4A  | 108.1(8)   | H3A  | C3   | H3B  | 108.3(13) |
| N1   | C4   | H4B  | 107.8(9)   |      |      |      |           |



**Table S.41.** Crystal data and structure refinement for **2'**.

|                                    |                                                                               |
|------------------------------------|-------------------------------------------------------------------------------|
| Identification code                | <b>2'</b>                                                                     |
| Empirical formula                  | C <sub>12</sub> H <sub>34</sub> Br <sub>2</sub> N <sub>2</sub> O <sub>2</sub> |
| Formula weight                     | 398.23                                                                        |
| Temperature/K                      | 103(2)                                                                        |
| Crystal system                     | monoclinic                                                                    |
| Space group                        | P2 <sub>1</sub> /c                                                            |
| a/Å                                | 7.3339(13)                                                                    |
| b/Å                                | 18.292(3)                                                                     |
| c/Å                                | 7.0915(12)                                                                    |
| α/°                                | 90.000000(0)                                                                  |
| β/°                                | 108.824(4)                                                                    |
| γ/°                                | 90.000000(0)                                                                  |
| Volume/Å <sup>3</sup>              | 900.5(3)                                                                      |
| Z                                  | 2                                                                             |
| ρ <sub>calc</sub> /cm <sup>3</sup> | 1.469                                                                         |
| μ/mm <sup>-1</sup>                 | 4.501                                                                         |
| F(000)                             | 412.0                                                                         |
| Crystal size/mm <sup>3</sup>       | 0.32 × 0.16 × 0.06                                                            |
| Radiation                          | MoKα (λ = 0.71073)                                                            |
| 2θ range for data collection/°     | 5.86 to 60.48                                                                 |
| Index ranges                       | -10 ≤ h ≤ 10, -25 ≤ k ≤ 25, -7 ≤ l ≤ 9                                        |
| Reflections collected              | 30772                                                                         |
| Independent reflections            | 2450 [R <sub>int</sub> = 0.0286, R <sub>sigma</sub> = 0.0146]                 |
| Data/restraints/parameters         | 2450/0/133                                                                    |
| Goodness-of-fit on F <sup>2</sup>  |                                                                               |
| Final R indexes [I >= 2σ (I)]      | R <sub>1</sub> = 0.0173, wR <sub>2</sub> = 0.0216                             |
| Final R indexes [all data]         | R <sub>1</sub> = 0.0173                                                       |
| CCDC Number                        | 2119854                                                                       |

**Table S.42.** Anisotropic Displacement Parameters (Å<sup>2</sup>×10<sup>3</sup>) for **2'**. The Anisotropic displacement factor exponent takes the form: -2π<sup>2</sup>[h<sup>2</sup>a<sup>2</sup>U<sub>11</sub>+2hka\*b\*U<sub>12</sub>+...].

| Atom | U <sub>11</sub> | U <sub>22</sub> | U <sub>33</sub> | U <sub>12</sub> | U <sub>13</sub> | U <sub>23</sub> |
|------|-----------------|-----------------|-----------------|-----------------|-----------------|-----------------|
| N1   | 12.9(5)         | 13.5(6)         | 12.1(6)         | 0.9(4)          | 5.0(5)          | -1.2(4)         |
| C1   | 14.9(6)         | 12.9(7)         | 13.9(8)         | 1.6(5)          | 6.2(6)          | 0.5(6)          |
| C2   | 15.1(6)         | 13.6(7)         | 14.0(8)         | 2.5(5)          | 6.5(6)          | 0.7(6)          |
| C3   | 14.4(6)         | 14.1(7)         | 13.5(8)         | 0.1(5)          | 5.6(6)          | 0.1(6)          |
| C4   | 24.5(7)         | 15.9(7)         | 24.6(10)        | 5.6(6)          | 12.7(7)         | -0.5(7)         |
| C5   | 17.1(7)         | 32.8(9)         | 12.8(8)         | 1.2(6)          | 4.6(6)          | -0.6(7)         |
| C6   | 16.1(6)         | 15.6(7)         | 22.7(9)         | -1.9(5)         | 8.9(6)          | -2.1(6)         |
| Br1  | 14.73(7)        | 14.06(8)        | 15.65(9)        | 0.53(5)         | 5.68(6)         | -0.86(5)        |
| O1   | 29.6            | 34.8            | 47.3            | -2.5            | 12.6            | -11.4           |

**Table S.43.** Bond Lengths for **2'**.

| Atom | Atom | Length/Å   | Atom | Atom | Length/Å   |
|------|------|------------|------|------|------------|
| N1   | C1   | 1.5119(17) | N1   | C6   | 1.4986(16) |
| N1   | C4   | 1.4964(16) | C1   | C2   | 1.5249(18) |
| N1   | C5   | 1.4962(18) | C2   | C3   | 1.5270(19) |

**Table S.44.** Bond Angles for **2'**.

| Atom | Atom | Atom | Angle/°    | Atom | Atom | Atom | Angle/°    |
|------|------|------|------------|------|------|------|------------|
| C1   | N1   | C4   | 107.83(10) | C4   | N1   | C6   | 108.13(11) |
| C1   | N1   | C5   | 111.18(11) | C5   | N1   | C6   | 109.46(11) |
| C1   | N1   | C6   | 111.14(10) | N1   | C1   | C2   | 114.65(11) |
| C4   | N1   | C5   | 109.02(11) | C1   | C2   | C3   | 110.36(11) |

**Table S.45.** Selected Bond Lengths for **2'**.

| Atom | Atom | Length/Å    |
|------|------|-------------|
| N1   | C1   | 1.5119(17)  |
| N1   | C4   | 1.4964(16)  |
| N1   | C5   | 1.4962(18)  |
| N1   | C6   | 1.4986(16)  |
| C1   | H1A  | 1.101(15)   |
| C1   | H1B  | 1.083(17)   |
| C1   | C2   | 1.5249(18)  |
| C2   | H2A  | 1.096(15)   |
| C2   | H2B  | 1.116(16)   |
| C2   | C3   | 1.5270(19)  |
| C3   | H3A  | 1.025(14)   |
| C3   | H3B  | 1.042(14)   |
| C4   | H4A  | 1.076(17)   |
| C4   | H4B  | 1.070(15)   |
| C4   | H4C  | 1.011(19)   |
| C5   | H5A  | 1.07(2)     |
| C5   | H5B  | 1.069(19)   |
| C5   | H5C  | 1.112(19)   |
| C6   | H6A  | 1.168(18)   |
| C6   | H6B  | 1.035(16)   |
| C6   | H6C  | 1.128(17)   |
| O1   | H1O  | 1.010442(0) |
| O1   | H2O  | 1.121890(0) |

**Table S.46.** Selected Angles for **2'**.

| Atom | Atom | Atom | Angle/°    | Atom | Atom | Atom | Angle/°   |
|------|------|------|------------|------|------|------|-----------|
| C1   | N1   | C4   | 107.83(10) | H3A  | C3   | H3B  | 110.5(11) |
| C1   | N1   | C5   | 111.18(11) | N1   | C4   | H4A  | 108.9(9)  |
| C1   | N1   | C6   | 111.14(10) | N1   | C4   | H4B  | 108.8(8)  |
| C4   | N1   | C5   | 109.02(11) | N1   | C4   | H4C  | 110.1(9)  |
| C4   | N1   | C6   | 108.13(11) | H4A  | C4   | H4B  | 112.0(11) |
| C5   | N1   | C6   | 109.46(11) | H4A  | C4   | H4C  | 113.5(13) |
| N1   | C1   | H1A  | 106.6(8)   | H4B  | C4   | H4C  | 103.4(12) |
| N1   | C1   | H1B  | 104.1(9)   | N1   | C5   | H5A  | 106.7(10) |
| N1   | C1   | C2   | 114.65(11) | N1   | C5   | H5B  | 109.0(11) |
| H1A  | C1   | H1B  | 106.0(10)  | N1   | C5   | H5C  | 110.9(9)  |
| C2   | C1   | H1A  | 112.4(8)   | H5A  | C5   | H5B  | 110.1(14) |
| C2   | C1   | H1B  | 112.4(8)   | H5A  | C5   | H5C  | 111.7(13) |
| C1   | C2   | H2A  | 113.6(8)   | H5B  | C5   | H5C  | 108.4(14) |
| C1   | C2   | H2B  | 112.0(8)   | N1   | C6   | H6A  | 107.6(8)  |
| C1   | C2   | C3   | 110.36(11) | N1   | C6   | H6B  | 108.7(9)  |
| H2A  | C2   | H2B  | 103.6(11)  | N1   | C6   | H6C  | 109.2(8)  |
| C3   | C2   | H2A  | 106.4(8)   | H6A  | C6   | H6B  | 111.1(13) |
| C3   | C2   | H2B  | 110.5(8)   | H6A  | C6   | H6C  | 106.5(12) |
| C2   | C3   | H3A  | 108.4(9)   | H6B  | C6   | H6C  | 113.5(13) |
| C2   | C3   | H3B  | 111.6(8)   | H1O  | O1   | H2O  | 97.3(0)   |

**Table S.47.** Crystal data and structure refinement for **5'**.

|                                    |                                                               |
|------------------------------------|---------------------------------------------------------------|
| Identification code                | <b>5'</b>                                                     |
| Empirical formula                  | C <sub>14</sub> H <sub>33</sub> I <sub>2</sub> N <sub>3</sub> |
| Formula weight                     | 497.2472                                                      |
| Temperature/K                      | 103(2)                                                        |
| Crystal system                     | monoclinic                                                    |
| Space group                        | P2 <sub>1</sub> /n                                            |
| a/Å                                | 9.920(2)                                                      |
| b/Å                                | 12.776(2)                                                     |
| c/Å                                | 16.440(3)                                                     |
| α/°                                | 90.000000(0)                                                  |
| β/°                                | 96.07(2)                                                      |
| γ/°                                | 90.000000(0)                                                  |
| Volume/Å <sup>3</sup>              | 2071.9(7)                                                     |
| Z                                  | 4                                                             |
| ρ <sub>calc</sub> /cm <sup>3</sup> | 1.594                                                         |
| μ/mm <sup>-1</sup>                 | 3.031                                                         |
| F(000)                             | 976.0                                                         |
| Crystal size/mm <sup>3</sup>       | 0.14 × 0.08 × 0.04                                            |
| Radiation                          | MoKα (λ = 0.71073)                                            |
| 2θ range for data collection/°     | 4.04 to 61.02                                                 |
| Index ranges                       | -13 ≤ h ≤ 14, -17 ≤ k ≤ 18, -23 ≤ l ≤ 23                      |
| Reflections collected              | 21599                                                         |
| Independent reflections            | 4547 [R <sub>int</sub> = 0.0489, R <sub>sigma</sub> = 0.0631] |
| Data/restraints/parameters         | 4547/0/304                                                    |
| Goodness-of-fit on F <sup>2</sup>  |                                                               |
| Final R indexes [I ≥ 2σ (I)]       | R <sub>1</sub> = 0.0404, wR <sub>2</sub> = 0.0235             |
| Final R indexes [all data]         | R <sub>1</sub> = 0.0404                                       |
| CCDC Number                        | 2119855                                                       |

**Table S.48.** Anisotropic Displacement Parameters ( $\text{\AA}^2 \times 10^3$ ) for **5'**. The Anisotropic displacement factor exponent takes the form:  $-2\pi^2[h^2a^*2U_{11}+2hka^*b^*U_{12}+\dots]$ .

| Atom | $U_{11}$  | $U_{22}$  | $U_{33}$  | $U_{12}$  | $U_{13}$ | $U_{23}$  |
|------|-----------|-----------|-----------|-----------|----------|-----------|
| I1   | 19.64(13) | 19.40(13) | 26.92(12) | -1.22(11) | 3.27(10) | 0.86(10)  |
| I2   | 24.01(14) | 20.73(14) | 26.17(12) | -1.49(12) | 2.52(10) | -2.83(11) |
| N1   | 29.9(19)  | 17.7(17)  | 24.7(15)  | -7.2(14)  | 5.4(14)  | -2.4(13)  |
| N2   | 18.8(17)  | 18.2(16)  | 20.4(14)  | -4.9(14)  | -0.5(12) | 0.4(13)   |
| C1   | 28(2)     | 16(2)     | 30(2)     | -6.4(17)  | 7.6(18)  | -1.4(16)  |
| C2   | 30(2)     | 18(2)     | 35(2)     | -6.4(19)  | 2.9(19)  | -2.2(18)  |
| C3   | 29(2)     | 15(2)     | 37(2)     | -4.6(18)  | 4(2)     | 0.6(18)   |
| C4   | 26(2)     | 15(2)     | 43(2)     | -3.1(19)  | 0(2)     | -1.6(18)  |
| C5   | 24(2)     | 19(2)     | 34(2)     | -1.2(18)  | 7.2(18)  | -1.3(17)  |
| C6   | 25(2)     | 19.0(19)  | 24.7(19)  | -1.8(18)  | 2.9(17)  | -1.1(17)  |
| C7   | 17(2)     | 30(3)     | 42(2)     | -5.0(19)  | 1.3(19)  | -3(2)     |
| C8   | 32(2)     | 20(2)     | 22.1(18)  | -2(2)     | 3.1(17)  | -0.3(17)  |
| C9   | 24(2)     | 23(2)     | 22.3(18)  | -3(2)     | -0.2(17) | -1.5(16)  |
| C10  | 51(3)     | 20(2)     | 24(2)     | -6(2)     | 5(2)     | -0.1(18)  |
| C11  | 29(3)     | 30(3)     | 64(3)     | -9(2)     | 16(2)    | -8(3)     |
| C12  | 37(3)     | 24(2)     | 29(2)     | -5(2)     | 8(2)     | -2.1(18)  |
| N3   | 82(3)     | 97(4)     | 78(3)     | 5(3)      | 41(3)    | 41(3)     |
| C13  | 37(3)     | 41(3)     | 36(2)     | 5(2)      | 11(2)    | 14(2)     |
| C14  | 33(3)     | 34(3)     | 30(2)     | -2(2)     | 4(2)     | 3.1(19)   |

**Table S.49.** Bond Lengths for **5'**.

| Atom | Atom | Length/\AA | Atom | Atom | Length/\AA |
|------|------|------------|------|------|------------|
| N1   | C1   | 1.514(4)   | C1   | C2   | 1.517(5)   |
| N1   | C10  | 1.506(5)   | C2   | C3   | 1.527(5)   |
| N1   | C11  | 1.501(5)   | C3   | C4   | 1.522(5)   |
| N1   | C12  | 1.491(4)   | C4   | C5   | 1.522(5)   |
| N2   | C6   | 1.509(4)   | C5   | C6   | 1.512(5)   |
| N2   | C7   | 1.501(5)   | N3   | C13  | 1.131(5)   |
| N2   | C8   | 1.496(4)   | C13  | C14  | 1.432(5)   |
| N2   | C9   | 1.499(4)   |      |      |            |

**Table S.50.** Bond Angles for **5'**.

| Atom | Atom | Atom | Angle/°  | Atom | Atom | Atom | Angle/°  |
|------|------|------|----------|------|------|------|----------|
| C1   | N1   | C10  | 111.0(3) | C7   | N2   | C9   | 108.6(3) |
| C1   | N1   | C11  | 106.8(3) | C8   | N2   | C9   | 108.9(3) |
| C1   | N1   | C12  | 111.8(3) | N1   | C1   | C2   | 115.3(3) |
| C10  | N1   | C11  | 109.2(3) | C1   | C2   | C3   | 109.2(3) |
| C10  | N1   | C12  | 109.6(3) | C2   | C3   | C4   | 112.8(3) |
| C11  | N1   | C12  | 108.3(3) | C3   | C4   | C5   | 113.5(3) |
| C6   | N2   | C7   | 107.0(3) | C4   | C5   | C6   | 110.6(3) |
| C6   | N2   | C8   | 112.6(3) | N2   | C6   | C5   | 115.4(3) |
| C6   | N2   | C9   | 111.2(3) | N3   | C13  | C14  | 179.4(5) |
| C7   | N2   | C8   | 108.5(3) |      |      |      |          |

**Table S.51.** Selected Bond Lengths for **5'**.

| Atom | Atom | Length/Å |
|------|------|----------|
| N1   | C1   | 1.514(4) |
| N1   | C10  | 1.506(5) |
| N1   | C11  | 1.501(5) |
| N1   | C12  | 1.491(4) |
| N2   | C6   | 1.509(4) |
| N2   | C7   | 1.501(5) |
| N2   | C8   | 1.496(4) |
| N2   | C9   | 1.499(4) |
| C1   | H1A  | 1.11(4)  |
| C1   | H1B  | 1.10(4)  |
| C1   | C2   | 1.517(5) |
| C2   | H2A  | 1.07(4)  |
| C2   | H2B  | 1.08(4)  |
| C2   | C3   | 1.527(5) |
| C3   | H3A  | 1.01(4)  |
| C3   | H3B  | 1.14(5)  |
| C3   | C4   | 1.522(5) |
| C4   | H4A  | 1.16(5)  |
| C4   | H4B  | 0.98(4)  |
| C4   | C5   | 1.522(5) |
| C5   | H5A  | 1.11(4)  |
| C5   | H5B  | 1.09(4)  |
| C5   | C6   | 1.512(5) |
| C6   | H6A  | 1.10(4)  |
| C6   | H6B  | 1.05(3)  |
| C7   | H7A  | 1.08(5)  |
| C7   | H7B  | 1.13(4)  |
| C7   | H7C  | 1.15(4)  |
| C8   | H8A  | 1.03(3)  |

| Atom | Atom | Length/Å |
|------|------|----------|
| C8   | H8B  | 1.11(4)  |
| C8   | H8C  | 1.09(4)  |
| C9   | H9A  | 1.12(4)  |
| C9   | H9B  | 1.07(3)  |
| C9   | H9C  | 1.10(4)  |
| C10  | H10A | 1.11(4)  |
| C10  | H10B | 1.07(4)  |
| C10  | H10C | 1.10(5)  |
| C11  | H11A | 0.99(5)  |
| C11  | H11B | 1.19(4)  |
| C11  | H11C | 1.09(4)  |
| C12  | H12A | 1.07(4)  |
| C12  | H12B | 1.08(4)  |
| C12  | H12C | 1.13(3)  |
| N3   | C13  | 1.131(5) |
| C13  | C14  | 1.432(5) |
| C14  | H14A | 1.07(4)  |
| C14  | H14B | 1.07(5)  |
| C14  | H14C | 1.14(5)  |

**Table S.52.** Selected Angles for **5'**.

| Atom | Atom | Atom | Angle/°   | Atom | Atom | Atom | Angle/°   |
|------|------|------|-----------|------|------|------|-----------|
| C1   | N1   | C10  | 111.0(3)  | C5   | C6   | H6B  | 109.8(19) |
| C1   | N1   | C11  | 106.8(3)  | H6A  | C6   | H6B  | 113(3)    |
| C1   | N1   | C12  | 111.8(3)  | N2   | C7   | H7A  | 110(2)    |
| C10  | N1   | C11  | 109.2(3)  | N2   | C7   | H7B  | 107(2)    |
| C10  | N1   | C12  | 109.6(3)  | N2   | C7   | H7C  | 107(2)    |
| C11  | N1   | C12  | 108.3(3)  | H7A  | C7   | H7B  | 116(3)    |
| C6   | N2   | C7   | 107.0(3)  | H7A  | C7   | H7C  | 104(3)    |
| C6   | N2   | C8   | 112.6(3)  | H7B  | C7   | H7C  | 112(3)    |
| C6   | N2   | C9   | 111.2(3)  | N2   | C8   | H8A  | 107(2)    |
| C7   | N2   | C8   | 108.5(3)  | N2   | C8   | H8B  | 108.5(18) |
| C7   | N2   | C9   | 108.6(3)  | N2   | C8   | H8C  | 109(2)    |
| C8   | N2   | C9   | 108.9(3)  | H8A  | C8   | H8B  | 118(3)    |
| N1   | C1   | H1A  | 105(2)    | H8A  | C8   | H8C  | 108(3)    |
| N1   | C1   | H1B  | 104.5(19) | H8B  | C8   | H8C  | 106(3)    |
| N1   | C1   | C2   | 115.3(3)  | N2   | C9   | H9A  | 106.4(19) |
| H1A  | C1   | H1B  | 111(3)    | N2   | C9   | H9B  | 109.4(18) |
| C2   | C1   | H1A  | 111(2)    | N2   | C9   | H9C  | 106.5(17) |
| C2   | C1   | H1B  | 111(2)    | H9A  | C9   | H9B  | 114(3)    |
| C1   | C2   | H2A  | 107(2)    | H9A  | C9   | H9C  | 111(3)    |
| C1   | C2   | H2B  | 113(2)    | H9B  | C9   | H9C  | 109(3)    |
| C1   | C2   | C3   | 109.2(3)  | N1   | C10  | H10A | 107(2)    |
| H2A  | C2   | H2B  | 109(3)    | N1   | C10  | H10B | 104.1(19) |

| Atom | Atom | Atom | Angle/°   | Atom | Atom | Atom | Angle/°   |
|------|------|------|-----------|------|------|------|-----------|
| C3   | C2   | H2A  | 112(3)    | N1   | C10  | H10C | 110(2)    |
| C3   | C2   | H2B  | 108(2)    | H10A | C10  | H10B | 117(3)    |
| C2   | C3   | H3A  | 115(3)    | H10A | C10  | H10C | 105(3)    |
| C2   | C3   | H3B  | 113(3)    | H10B | C10  | H10C | 114(3)    |
| C2   | C3   | C4   | 112.8(3)  | N1   | C11  | H11A | 103(3)    |
| H3A  | C3   | H3B  | 113(3)    | N1   | C11  | H11B | 107(2)    |
| C4   | C3   | H3A  | 99(3)     | N1   | C11  | H11C | 106(2)    |
| C4   | C3   | H3B  | 102(3)    | H11A | C11  | H11B | 115(4)    |
| C3   | C4   | H4A  | 108(2)    | H11A | C11  | H11C | 111(3)    |
| C3   | C4   | H4B  | 106(3)    | H11B | C11  | H11C | 114(3)    |
| C3   | C4   | C5   | 113.5(3)  | N1   | C12  | H12A | 108(2)    |
| H4A  | C4   | H4B  | 108(3)    | N1   | C12  | H12B | 109(2)    |
| C5   | C4   | H4A  | 106(2)    | N1   | C12  | H12C | 109.7(19) |
| C5   | C4   | H4B  | 115(3)    | H12A | C12  | H12B | 103(3)    |
| C4   | C5   | H5A  | 112(2)    | H12A | C12  | H12C | 114(3)    |
| C4   | C5   | H5B  | 108(2)    | H12B | C12  | H12C | 112(3)    |
| C4   | C5   | C6   | 110.6(3)  | N3   | C13  | C14  | 179.4(5)  |
| H5A  | C5   | H5B  | 105(3)    | C13  | C14  | H14A | 108(2)    |
| C6   | C5   | H5A  | 112(2)    | C13  | C14  | H14B | 109(3)    |
| C6   | C5   | H5B  | 109(2)    | C13  | C14  | H14C | 109(2)    |
| N2   | C6   | C5   | 115.4(3)  | H14A | C14  | H14B | 112(3)    |
| N2   | C6   | H6A  | 104(2)    | H14A | C14  | H14C | 110(3)    |
| N2   | C6   | H6B  | 104.5(18) | H14B | C14  | H14C | 109(3)    |
| C5   | C6   | H6A  | 110(2)    |      |      |      |           |



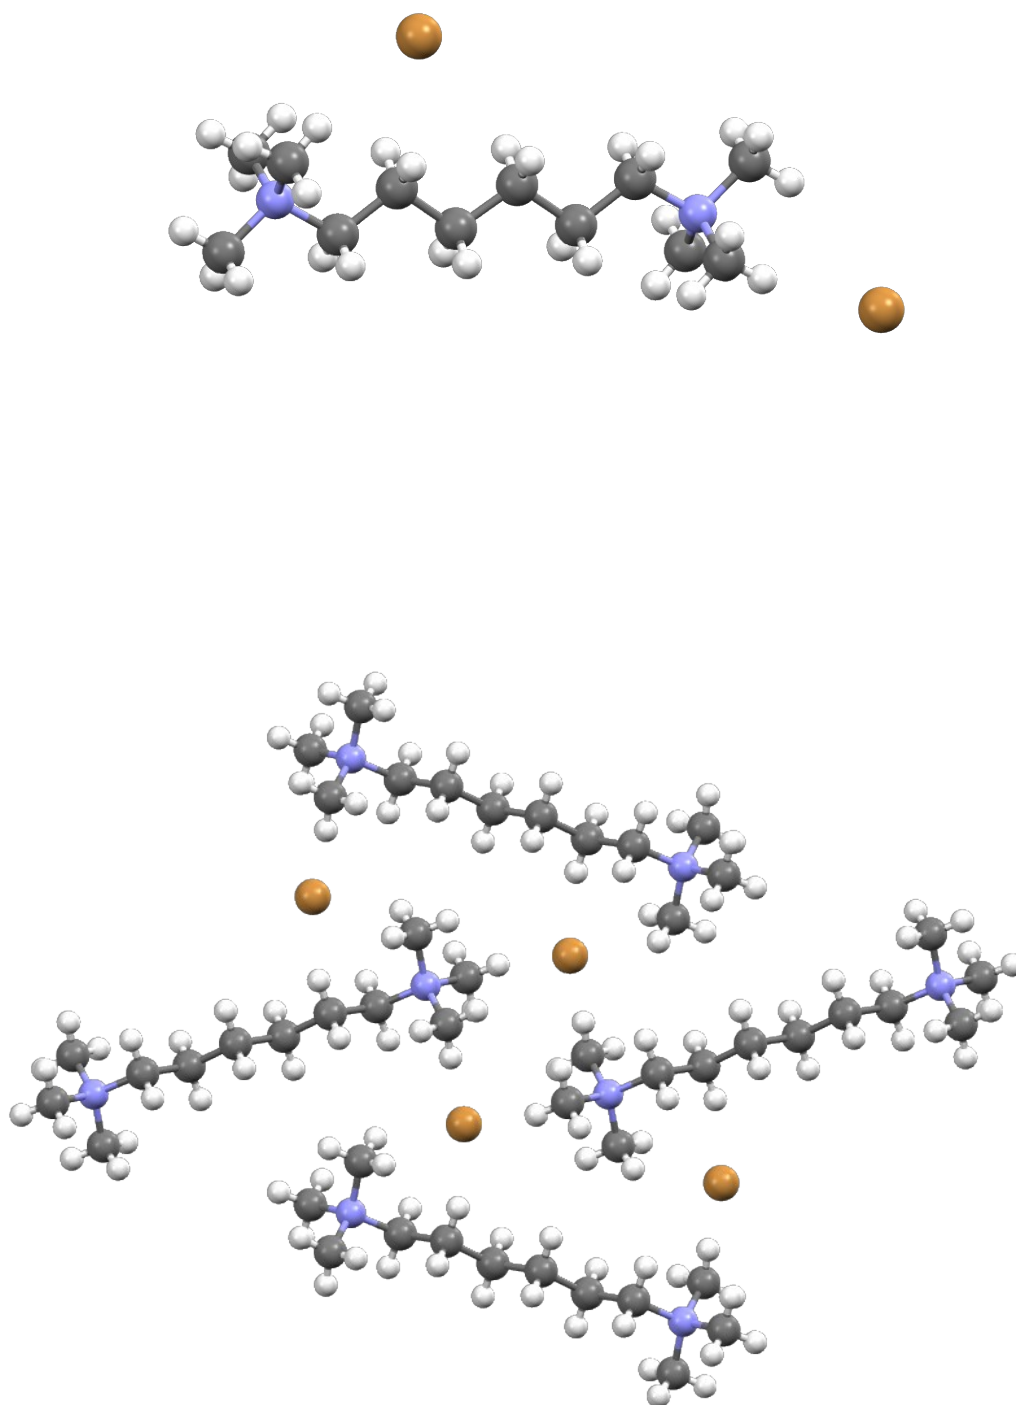

**Figure S.1.** Asymmetric unit (above) and crystal packing (below) of crystal structure 1.

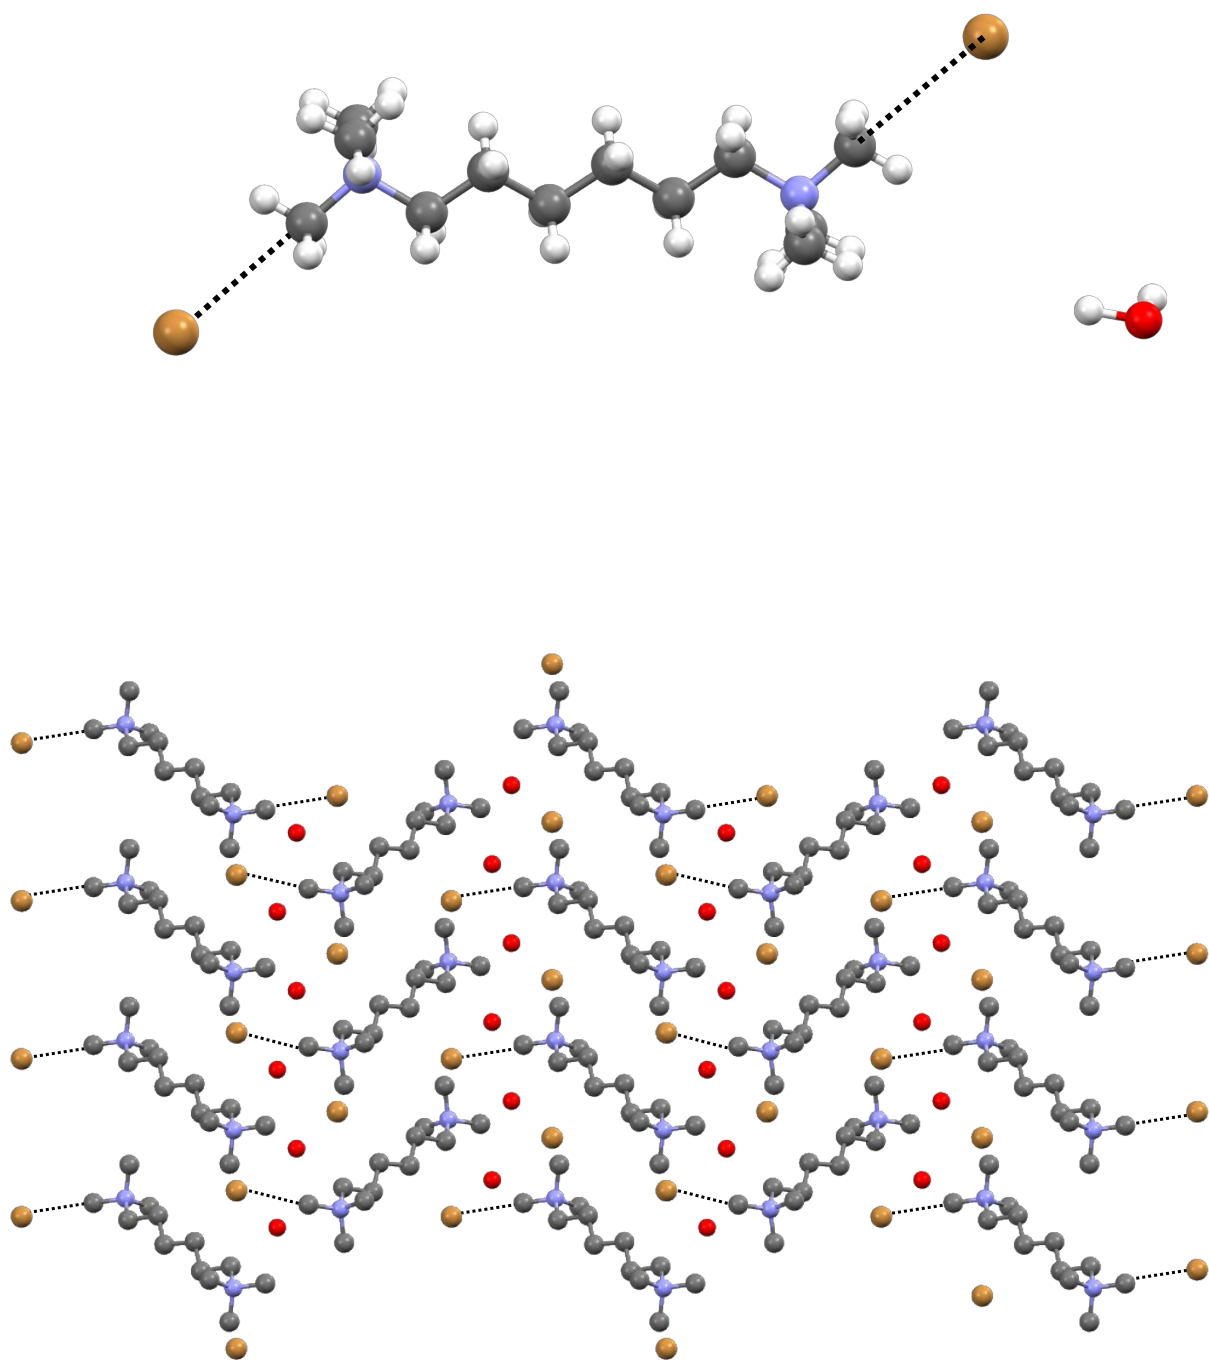

**Figure S.2.** Asymmetric unit (above) and crystal packing (below) of crystal structure **2**. Tetrel bonds are black dotted lines. Hydrogens removed for clarity.

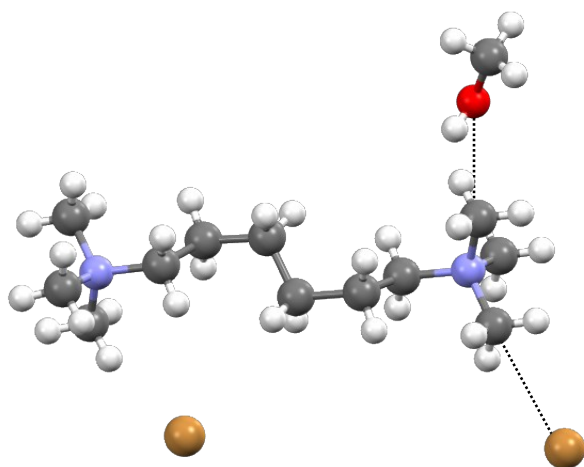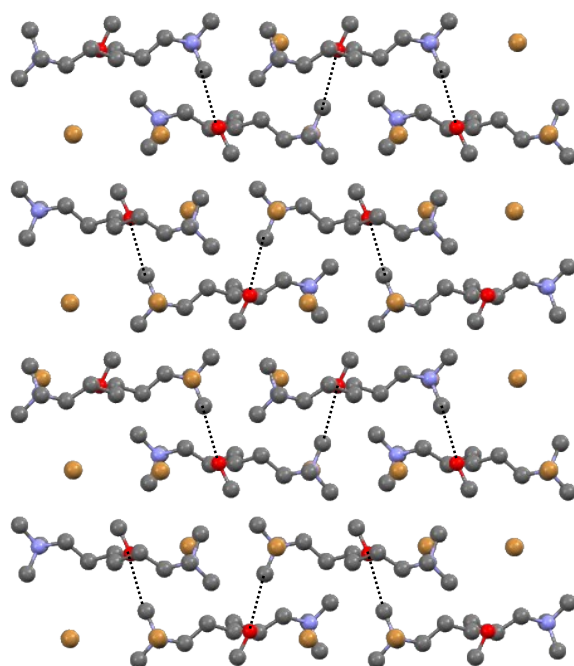

**Figure S.3.** Asymmetric unit (above) and crystal packing (below) of crystal structure **3**. Tetrel bonds are black dotted lines. Hydrogens removed for clarity.

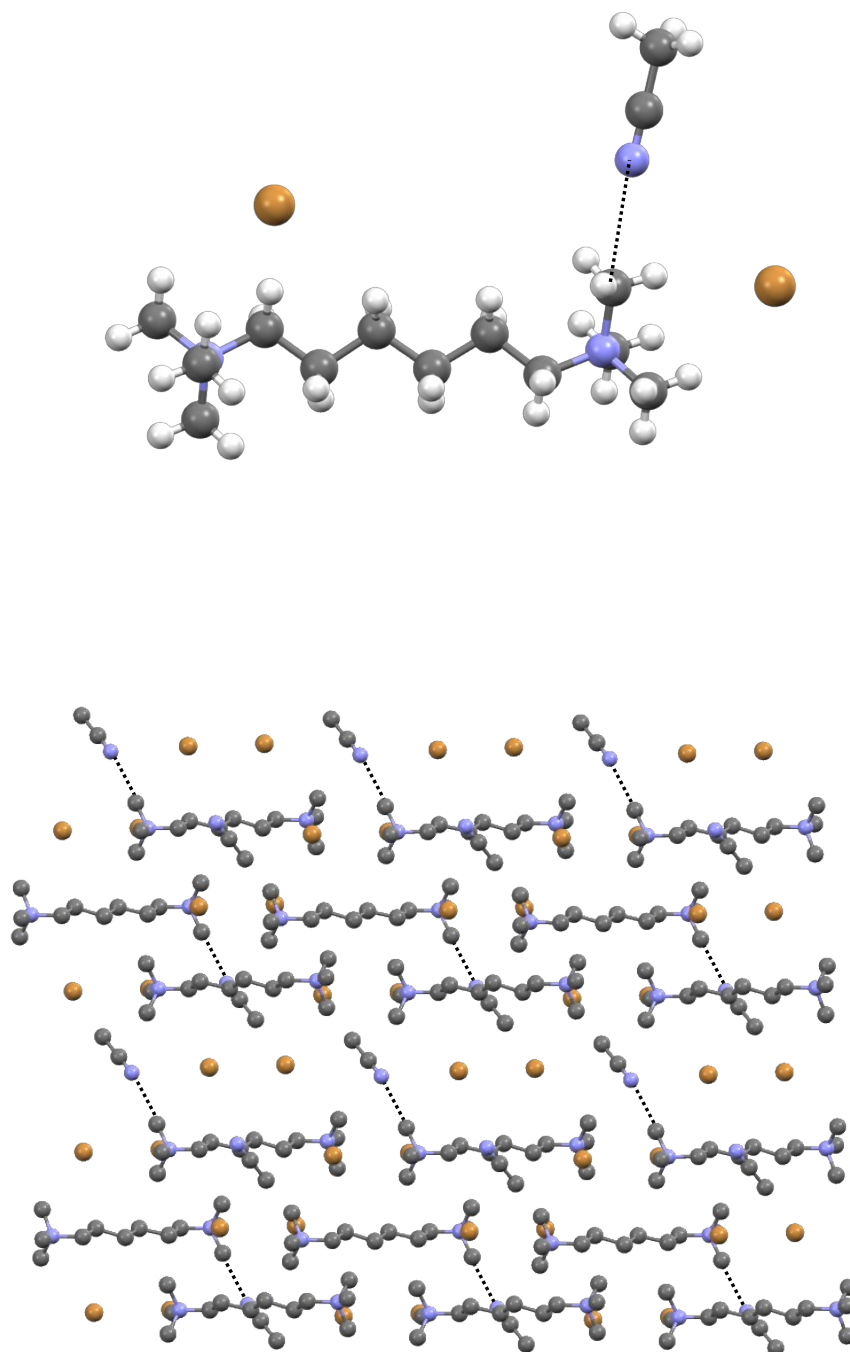

**Figure S.4.** Asymmetric unit (above) and crystal packing (below) of crystal structure **4**. Tetrel bonds are black dotted lines. Hydrogens removed for clarity.

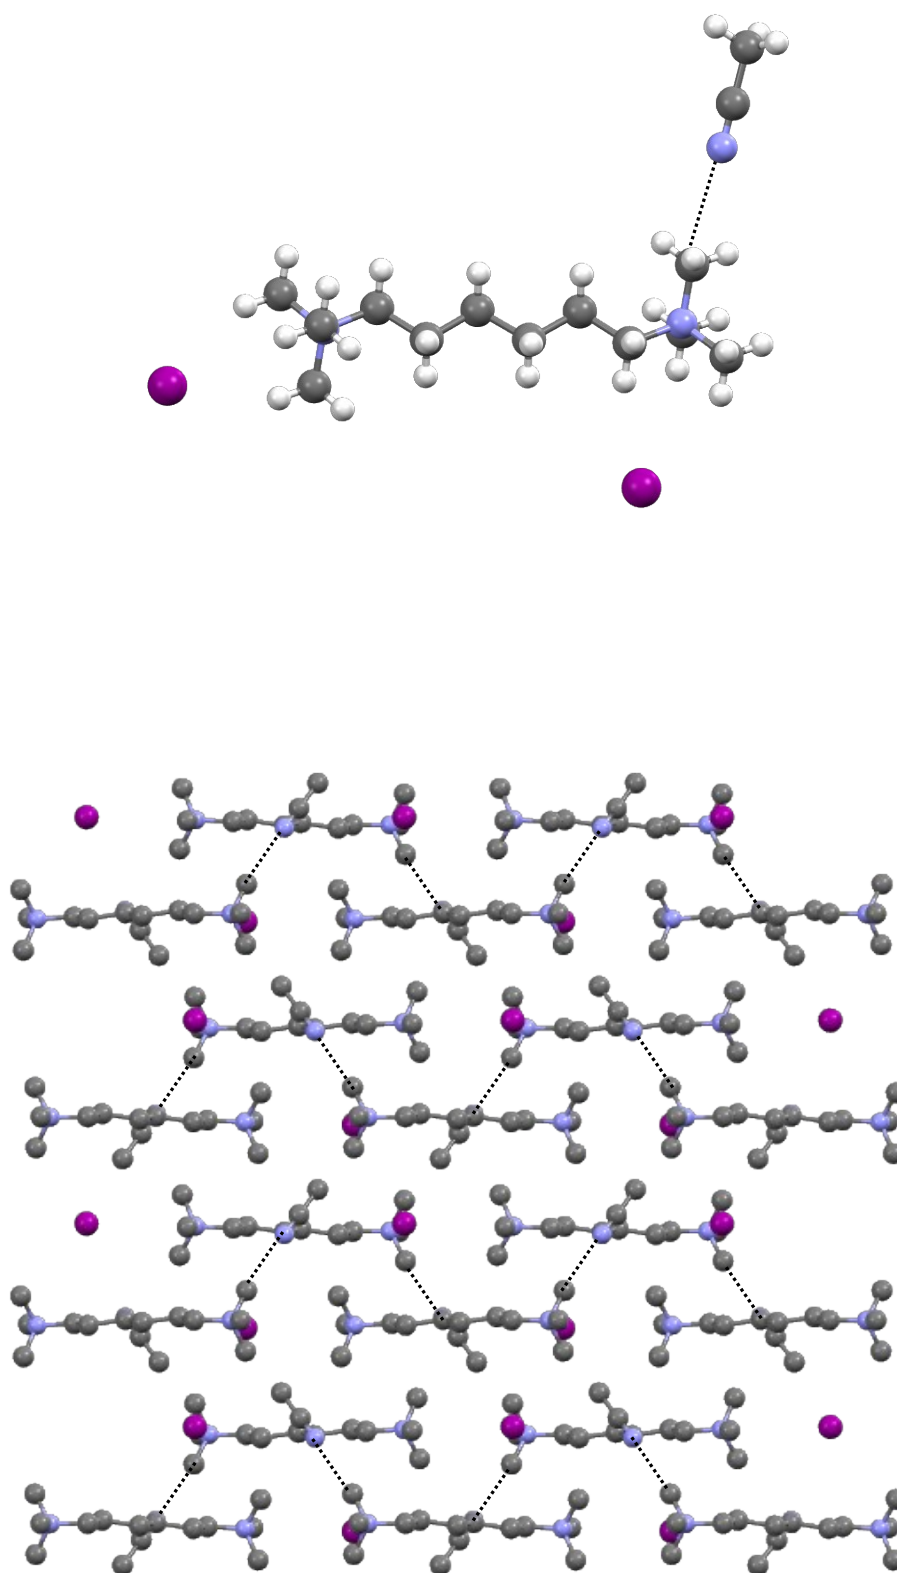

**Figure S.5.** Asymmetric unit (above) and crystal packing (below) of crystal structure **5**. Tetrel bonds are black dotted lines. Hydrogens removed for clarity.

### S.3. CSD Surveys.

**Table S.53.** Hexamethonium (1,6-bis-(trimethyl ammonium) hexane) structures present on the CSD. In bold structures that present a short contact between one of the methyl's carbons and an electron rich atom (atoms considered N, P, O, S, Se, F, Cl, Br, I) establishing a  $N^+-C\cdots Nu$  angle comprised between 160 and 180°. In bold and red entries where the contact is shorter than the sum of their respective vdW radii, in bold and black contacts where the contact is shorter than the sum plus 0.2 Å.

|               |                 |               |               |
|---------------|-----------------|---------------|---------------|
| DIQBIQ        | <b>HMENAM01</b> | <b>NUTTAY</b> | <b>URUBUF</b> |
| <b>DIQBOW</b> | HMTMAC          | NUTTAY01      | <b>XEPDEB</b> |
| <b>DIQBUC</b> | HMTMAC01        | <b>SOFYER</b> | <b>YEPGOQ</b> |
| <b>FUGGET</b> | MUXSUT          | <b>TIBROL</b> | <b>PUPBEK</b> |
| HMACQM        | <b>NUTSOL</b>   | URUBIT        | VUGNUJ        |
| <b>HMENAM</b> | NUTSUR          | URUBOZ        | VUGNUJ01      |

**Table S.54.** Octamethonium (1,8-bis-(trimethyl ammonium) octane) structures present on the CSD. In bold structures that present a short contact between one of the methyl's carbons and an electron rich atom (atoms considered N, P, O, S, Se, F, Cl, Br, I) establishing a  $N^+-C\cdots Nu$  angle comprised between 160 and 180°. In bold and red entries where the contact is shorter than the sum of their respective vdW radii, in bold and black contacts where the contact is shorter than the sum plus 0.2 Å.

|               |        |        |  |
|---------------|--------|--------|--|
| <b>XOTZOW</b> | XOTZUC | ZIHXOG |  |
|---------------|--------|--------|--|

**Table S.55.** Decamethonium (1,10-bis(trimethylammonium) decane) structures present on the CSD. In bold structures that present a short contact between one of the methyl's carbons and an electron rich atom (atoms considered N, P, O, S, Se, F, Cl, Br, I) establishing a  $N^+-C\cdots Nu$  angle comprised between 160 and 180°. In bold and red entries where the contact is shorter than the sum of their respective vdW radii, in bold and black contacts where the contact is shorter than the sum plus 0.2 Å.

|               |               |               |  |
|---------------|---------------|---------------|--|
| DIMENAM       | SIHYOZ        | <b>XOVBAM</b> |  |
| SIHFAQ        | <b>SIHYUF</b> | <b>XOVBEQ</b> |  |
| <b>SIHYIT</b> | <b>WESLAK</b> | XOVBIU        |  |

## S.4. Fundamentals of Hirshfeld Atom Refinement

The Hirshfeld atom refinement (HAR)<sup>3,4,5</sup> is a self-consistent refinement procedure based on the following steps.

1. Quantum chemical calculation on a system that at least corresponds to the asymmetric unit of the target crystal structure. The starting geometry is usually the one that is obtained from the preliminary IAM refinement.
2. Subdivision of the obtained electron density  $\rho_0(r)$  (associated with the quantum chemical calculation at point 1) into atomic contributions using the Hirshfeld stockholder partitioning technique<sup>6,7</sup>. According to this method, the atomic density distribution for each atom is given by

$$\rho_A(r) = w_A(r) \rho_0(r) \quad (S1),$$

where  $w_A(r)$  is the Hirshfeld weight function provided by the ration between the spherically averaged atomic density of the atom under consideration ( $\rho_A^o$ ) and the promolecular density, which is the sum of the spherically averaged atomic densities of all the atoms forming the investigated system:

$$w_A(r) = \frac{\rho_A^o(r)}{\sum_{B=1}^{N_{atoms}} \rho_B^o(r)} \quad (S2)$$

3. Calculation of the atomic form factors through Fourier transformation of the atomic densities obtained at point 2.
4. Calculation of the global structure factors  $\{F_h^{calc}\}$  as sum of the atomic form factors resulting from point 3.
5. Least-squares minimization of the  $\chi^2$  statistical agreement between experimental and calculated structure factor amplitudes with respect to the scale factor  $\eta$  (see equation (S3) below), atomic coordinates and ADPs. The  $\chi^2$  statistical agreement is given by the following relation:

$$\chi^2 = \frac{1}{N_r - N_p} \sum_h \frac{(\eta |F_h^{calc}| - |F_h^{exp}|)^2}{\sigma_h^2} \quad (S3)$$

with  $N_r$  as the number of reflections,  $N_p$  as the number of parameters in the model,  $|F_h^{calc}|$  and  $|F_h^{exp}|$  as the calculated and experimental structure factor amplitudes, respectively, for the reflection corresponding to the Miller indices triplet  $h = (h, k, l)$ ,  $\sigma_h$  as the experimental error associated with the experimental structure factor amplitude  $|F_h^{exp}|$ , and  $\eta$  as an overall ( $h$ -independent) factor that puts  $|F_h^{calc}|$  on the same scale of  $|F_h^{exp}|$ .

6. Check of convergence on the atomic structural parameters (i.e., atomic coordinates and ADPs). When convergence is achieved, the iterative procedure ends, and electronic properties of the system may be calculated exploiting the wave function / electron density corresponding to the converged structure. Otherwise, the new geometry is exploited to start a new iteration and, particularly, to carry out a new quantum chemical calculation (see point 1).

As already mentioned in the main text, it is worth noting that, in order to properly account for the crystal field effects, the quantum mechanical computations at point 1 can be also performed by embedding the reference system through a cluster of point charges and dipoles. They are generally placed on all those atoms of the surrounding moieties of the crystal that have at least one atom at a distance lower than 8 Å from the reference system considered for the quantum chemical calculations.



## S.5 References

---

- <sup>1</sup> Martí-Rujas, J.; Meazza, L.; Lim, G. K.; Terraneo, G.; Pilati, T.; Harris, K. D. M.; Metrangolo, P.; Resnati, G. An Adaptable and Dynamically Porous Organic Salt Traps Unique Tetrahalide Dianions, *Angew. Chemie Int. Ed.* **2013**, *52*, 13444–13448.
- <sup>2</sup> Meazza, L.; Martí-Rujas, J.; Terraneo, G.; Castiglioni, C.; Milani, A.; Pilati, T.; Metrangolo, P.; Resnati, G. Solid-state synthesis of mixed trihalides via reversible absorption of dihalogens by non porous onium salts, *CrystEngComm* **2011**, *13*, 4427-4435.
- <sup>3</sup> Jayatilaka, D.; Dittrich, B. X-ray structure refinement using aspherical atomic density functions obtained from quantum-mechanical calculations. *Acta Cryst., Sect. A* **2008**, *64*, 383–393.
- <sup>4</sup> Capelli, S.C.; Bürgi, H.-B.; Dittrich, B.; Grabowsky, S.; Jayatilaka, D. Hirshfeld atom refinement. *IUCrJ* **2014**, *1*, 361-379.
- <sup>5</sup> Woińska, M.; Grabowsky, S.; Dominiak, P. M.; Woźniak, K.; Jayatilaka, D. Hydrogen atoms can be located accurately and precisely by x-ray crystallography. *Sci. Adv.* **2016**, *2*, e1600192.
- <sup>6</sup> Hirshfeld, F.L. XVII. Spatial Partitioning of Charge Density. *Isr. J. Chem.* **1977**, *16*, 198-201.
- <sup>7</sup> Hirshfeld, F.L. Bonded-Atom Fragments for Describing Molecular Charge Densities. *Theoret. Chim. Acta* **1977**, *44*, 129-138.
